# Supplementary material for: Human B Cell Differentiation Is Characterized by Progressive Remodeling of O-Linked Glycans
Source: Front Immunol. 2018 Dec 14;9:2857. doi: 10.3389/fimmu.2018.02857 (PMC6302748; doi:10.3389/fimmu.2018.02857)
Supplement: Supplementary file 1 [file Data_Sheet_1.xlsx]

## Sheet: Sheet1
Supplementary Information 1: MS analysis of proteins >37kDa detected in PNA-agarose immunoprecipitates of Ramos and Raji B cells.
Ramos and Raji B cell lysates were subject to PNA-agarose immunoprecipitation, followed by boiling of PNA eluates in sample buffer, and short run SDS-PAGE. Gel fragments including proteins >37kDa (determined by MW markers) were excised and analyzed by MALDI-TOF MS. Obvious contaminents (e.g. keratins) have been removed. Protein spectrum counts were sorted below based on detection in both B cell l…
Spectrum count report
	Accession Number	Identified Proteins (508/530)	Molecular Weight	Spectrum Counts
				Raji Bcell	Ramos Bcell	blank gel fragment
1	E9PC28|E9PC28_HUMAN (+3)	Receptor-type tyrosine-protein phosphatase C OS=Homo sapiens GN=PTPRC PE=2 SV=1	142 kDa	87	97	1
2	P25705|ATPA_HUMAN	ATP synthase subunit alpha, mitochondrial OS=Homo sapiens GN=ATP5A1 PE=1 SV=1	60 kDa	111	63	1
3	P14618|KPYM_HUMAN	Pyruvate kinase PKM OS=Homo sapiens GN=PKM PE=1 SV=4	58 kDa	79	62	0
4	P60709|ACTB_HUMAN (+1)	Actin, cytoplasmic 1 OS=Homo sapiens GN=ACTB PE=1 SV=1	42 kDa	57	62	11
5	P06576|ATPB_HUMAN	ATP synthase subunit beta, mitochondrial OS=Homo sapiens GN=ATP5B PE=1 SV=3	57 kDa	62	49	1
6	P10809|CH60_HUMAN	60 kDa heat shock protein, mitochondrial OS=Homo sapiens GN=HSPD1 PE=1 SV=2	61 kDa	68	36	2
7	P08238|HS90B_HUMAN	Heat shock protein HSP 90-beta OS=Homo sapiens GN=HSP90AB1 PE=1 SV=4	83 kDa	44	52	2
8	P04406|G3P_HUMAN	Glyceraldehyde-3-phosphate dehydrogenase OS=Homo sapiens GN=GAPDH PE=1 SV=3	36 kDa	51	40	3
9	P68371|TBB4B_HUMAN	Tubulin beta-4B chain OS=Homo sapiens GN=TUBB4B PE=1 SV=1	50 kDa	35	55	2
10	P68363|TBA1B_HUMAN	Tubulin alpha-1B chain OS=Homo sapiens GN=TUBA1B PE=1 SV=1	50 kDa	35	48	1
11	P13639|EF2_HUMAN	Elongation factor 2 OS=Homo sapiens GN=EEF2 PE=1 SV=4	95 kDa	41	43	0
12	P11142|HSP7C_HUMAN	Heat shock cognate 71 kDa protein OS=Homo sapiens GN=HSPA8 PE=1 SV=1	71 kDa	34	33	0
13	P49368|TCPG_HUMAN	T-complex protein 1 subunit gamma OS=Homo sapiens GN=CCT3 PE=1 SV=4	61 kDa	35	29	0
14	P50990|TCPQ_HUMAN	T-complex protein 1 subunit theta OS=Homo sapiens GN=CCT8 PE=1 SV=4	60 kDa	30	32	0
15	P50991|TCPD_HUMAN	T-complex protein 1 subunit delta OS=Homo sapiens GN=CCT4 PE=1 SV=4	58 kDa	36	23	1
16	P07900-2|HS90A_HUMAN (+1)	Isoform 2 of Heat shock protein HSP 90-alpha OS=Homo sapiens GN=HSP90AA1	98 kDa	43	45	0
17	P68104|EF1A1_HUMAN	Elongation factor 1-alpha 1 OS=Homo sapiens GN=EEF1A1 PE=1 SV=1	50 kDa	33	20	1
18	P00558|PGK1_HUMAN	Phosphoglycerate kinase 1 OS=Homo sapiens GN=PGK1 PE=1 SV=3	45 kDa	23	29	1
19	O00410-3|IPO5_HUMAN (+1)	Isoform 3 of Importin-5 OS=Homo sapiens GN=IPO5	126 kDa	23	30	0
20	P06744|G6PI_HUMAN	Glucose-6-phosphate isomerase OS=Homo sapiens GN=GPI PE=1 SV=4	63 kDa	26	25	0
21	P48643|TCPE_HUMAN	T-complex protein 1 subunit epsilon OS=Homo sapiens GN=CCT5 PE=1 SV=1	60 kDa	24	25	0
22	P38646|GRP75_HUMAN	Stress-70 protein, mitochondrial OS=Homo sapiens GN=HSPA9 PE=1 SV=2	74 kDa	28	19	0
23	P06733|ENOA_HUMAN	Alpha-enolase OS=Homo sapiens GN=ENO1 PE=1 SV=2	47 kDa	17	23	1
24	P78371|TCPB_HUMAN	T-complex protein 1 subunit beta OS=Homo sapiens GN=CCT2 PE=1 SV=4	57 kDa	22	16	0
25	Q8WZ42-12|TITIN_HUMAN	Isoform 12 of Titin OS=Homo sapiens GN=TTN	3994 kDa	11	10	14
26	P34897-3|GLYM_HUMAN (+1)	Isoform 3 of Serine hydroxymethyltransferase, mitochondrial OS=Homo sapiens GN=SHMT2	53 kDa	17	19	0
27	P49588|SYAC_HUMAN	Alanine--tRNA ligase, cytoplasmic OS=Homo sapiens GN=AARS PE=1 SV=2	107 kDa	15	21	0
28	P52272-2|HNRPM_HUMAN (+1)	Isoform 2 of Heterogeneous nuclear ribonucleoprotein M OS=Homo sapiens GN=HNRNPM	74 kDa	23	12	0
29	Q99832|TCPH_HUMAN	T-complex protein 1 subunit eta OS=Homo sapiens GN=CCT7 PE=1 SV=2	59 kDa	21	14	0
30	P17987|TCPA_HUMAN	T-complex protein 1 subunit alpha OS=Homo sapiens GN=TCP1 PE=1 SV=1	60 kDa	20	14	0
31	P31689|DNJA1_HUMAN	DnaJ homolog subfamily A member 1 OS=Homo sapiens GN=DNAJA1 PE=1 SV=2	45 kDa	19	15	0
32	P22234-2|PUR6_HUMAN (+1)	Isoform 2 of Multifunctional protein ADE2 OS=Homo sapiens GN=PAICS	48 kDa	16	17	0
33	Q9Y4L1|HYOU1_HUMAN	Hypoxia up-regulated protein 1 OS=Homo sapiens GN=HYOU1 PE=1 SV=1	111 kDa	20	13	0
34	P41250|SYG_HUMAN	Glycine--tRNA ligase OS=Homo sapiens GN=GARS PE=1 SV=3	83 kDa	18	13	1
35	P28838-2|AMPL_HUMAN (+1)	Isoform 2 of Cytosol aminopeptidase OS=Homo sapiens GN=LAP3	53 kDa	11	21	0
36	P35579|MYH9_HUMAN	Myosin-9 OS=Homo sapiens GN=MYH9 PE=1 SV=4	227 kDa	14	18	0
37	P34932|HSP74_HUMAN	Heat shock 70 kDa protein 4 OS=Homo sapiens GN=HSPA4 PE=1 SV=4	94 kDa	16	14	1
38	P60842|IF4A1_HUMAN	Eukaryotic initiation factor 4A-I OS=Homo sapiens GN=EIF4A1 PE=1 SV=1	46 kDa	18	13	0
39	P02768|ALBU_HUMAN	Serum albumin OS=Homo sapiens GN=ALB PE=1 SV=2	69 kDa	10	11	9
40	P12004|PCNA_HUMAN	Proliferating cell nuclear antigen OS=Homo sapiens GN=PCNA PE=1 SV=1	29 kDa	17	11	2
41	Q92598-2|HS105_HUMAN (+1)	Isoform Beta of Heat shock protein 105 kDa OS=Homo sapiens GN=HSPH1	92 kDa	24	5	1
42	Q14974|IMB1_HUMAN	Importin subunit beta-1 OS=Homo sapiens GN=KPNB1 PE=1 SV=2	97 kDa	15	13	0
43	P49327|FAS_HUMAN	Fatty acid synthase OS=Homo sapiens GN=FASN PE=1 SV=3	273 kDa	21	7	0
44	O60884|DNJA2_HUMAN	DnaJ homolog subfamily A member 2 OS=Homo sapiens GN=DNAJA2 PE=1 SV=1	46 kDa	13	14	0
45	P11021|GRP78_HUMAN	78 kDa glucose-regulated protein OS=Homo sapiens GN=HSPA5 PE=1 SV=2	72 kDa	17	15	0
46	P02786|TFR1_HUMAN	Transferrin receptor protein 1 OS=Homo sapiens GN=TFRC PE=1 SV=2	85 kDa	12	14	0
47	Q9Y617|SERC_HUMAN	Phosphoserine aminotransferase OS=Homo sapiens GN=PSAT1 PE=1 SV=2	40 kDa	13	13	0
48	P07814|SYEP_HUMAN	Bifunctional glutamate/proline--tRNA ligase OS=Homo sapiens GN=EPRS PE=1 SV=5	171 kDa	14	11	0
49	P13796|PLSL_HUMAN	Plastin-2 OS=Homo sapiens GN=LCP1 PE=1 SV=6	70 kDa	12	13	0
50	P55060-3|XPO2_HUMAN (+1)	Isoform 3 of Exportin-2 OS=Homo sapiens GN=CSE1L	108 kDa	12	13	0
51	Q9H4M9|EHD1_HUMAN	EH domain-containing protein 1 OS=Homo sapiens GN=EHD1 PE=1 SV=2	61 kDa	12	13	0
52	P49411|EFTU_HUMAN	Elongation factor Tu, mitochondrial OS=Homo sapiens GN=TUFM PE=1 SV=2	50 kDa	12	10	1
53	B4DTG2|B4DTG2_HUMAN (+1)	Elongation factor 1-gamma OS=Homo sapiens GN=EEF1G PE=2 SV=1	56 kDa	13	10	0
54	K7EJE8|K7EJE8_HUMAN (+3)	Lon protease homolog, mitochondrial OS=Homo sapiens GN=LONP1 PE=2 SV=1	93 kDa	10	13	0
55	P08243-2|ASNS_HUMAN (+2)	Isoform 2 of Asparagine synthetase [glutamine-hydrolyzing] OS=Homo sapiens GN=ASNS	62 kDa	10	13	0
56	P14625|ENPL_HUMAN	Endoplasmin OS=Homo sapiens GN=HSP90B1 PE=1 SV=1	92 kDa	13	14	0
57	P22695|QCR2_HUMAN	Cytochrome b-c1 complex subunit 2, mitochondrial OS=Homo sapiens GN=UQCRC2 PE=1 SV=3	48 kDa	16	7	0
58	P33991|MCM4_HUMAN	DNA replication licensing factor MCM4 OS=Homo sapiens GN=MCM4 PE=1 SV=5	97 kDa	14	9	0
59	P31146|COR1A_HUMAN	Coronin-1A OS=Homo sapiens GN=CORO1A PE=1 SV=4	51 kDa	9	12	1
60	O00148|DX39A_HUMAN	ATP-dependent RNA helicase DDX39A OS=Homo sapiens GN=DDX39A PE=1 SV=2	49 kDa	15	7	0
61	O43242|PSMD3_HUMAN	26S proteasome non-ATPase regulatory subunit 3 OS=Homo sapiens GN=PSMD3 PE=1 SV=2	61 kDa	14	8	0
62	P07437|TBB5_HUMAN	Tubulin beta chain OS=Homo sapiens GN=TUBB PE=1 SV=2	50 kDa	40	58	0
63	P42704|LPPRC_HUMAN	Leucine-rich PPR motif-containing protein, mitochondrial OS=Homo sapiens GN=LRPPRC PE=1 SV=3	158 kDa	6	16	0
64	Q14697|GANAB_HUMAN	Neutral alpha-glucosidase AB OS=Homo sapiens GN=GANAB PE=1 SV=3	107 kDa	9	13	0
65	Q8NC51-2|PAIRB_HUMAN (+3)	Isoform 2 of Plasminogen activator inhibitor 1 RNA-binding protein OS=Homo sapiens GN=SERBP1	44 kDa	10	4	7
66	P13010|XRCC5_HUMAN	X-ray repair cross-complementing protein 5 OS=Homo sapiens GN=XRCC5 PE=1 SV=3	83 kDa	8	12	0
67	P29144|TPP2_HUMAN (+1)	Tripeptidyl-peptidase 2 OS=Homo sapiens GN=TPP2 PE=1 SV=4	138 kDa	11	9	0
68	P40227|TCPZ_HUMAN	T-complex protein 1 subunit zeta OS=Homo sapiens GN=CCT6A PE=1 SV=3	58 kDa	9	9	1
69	F5H2F4|F5H2F4_HUMAN (+1)	C-1-tetrahydrofolate synthase, cytoplasmic OS=Homo sapiens GN=MTHFD1 PE=2 SV=1	111 kDa	8	10	1
70	H3BRV0|H3BRV0_HUMAN (+1)	Eukaryotic translation initiation factor 3 subunit C OS=Homo sapiens GN=EIF3C PE=2 SV=1	104 kDa	11	7	1
71	B4DGP8|B4DGP8_HUMAN (+1)	Calnexin OS=Homo sapiens GN=CANX PE=2 SV=1	72 kDa	10	9	0
72	E7EU23|E7EU23_HUMAN (+2)	Rab GDP dissociation inhibitor beta OS=Homo sapiens GN=GDI2 PE=2 SV=1	51 kDa	10	9	0
73	O43175|SERA_HUMAN	D-3-phosphoglycerate dehydrogenase OS=Homo sapiens GN=PHGDH PE=1 SV=4	57 kDa	6	13	0
74	P08237-2|PFKAM_HUMAN (+2)	Isoform 2 of ATP-dependent 6-phosphofructokinase, muscle type OS=Homo sapiens GN=PFKM	?	14	5	0
75	Q9UHD8-2|SEPT9_HUMAN (+3)	Isoform 2 of Septin-9 OS=Homo sapiens GN=SEPT9	64 kDa	10	7	1
76	P05023-4|AT1A1_HUMAN (+1)	Isoform 4 of Sodium/potassium-transporting ATPase subunit alpha-1 OS=Homo sapiens GN=ATP1A1	113 kDa	6	12	0
77	Q92945|FUBP2_HUMAN	Far upstream element-binding protein 2 OS=Homo sapiens GN=KHSRP PE=1 SV=4	73 kDa	6	12	0
78	P78527|PRKDC_HUMAN	DNA-dependent protein kinase catalytic subunit OS=Homo sapiens GN=PRKDC PE=1 SV=3	469 kDa	2	15	1
79	P00338-3|LDHA_HUMAN (+1)	Isoform 3 of L-lactate dehydrogenase A chain OS=Homo sapiens GN=LDHA	40 kDa	5	9	3
80	B4DWW4|B4DWW4_HUMAN (+1)	DNA replication licensing factor MCM3 OS=Homo sapiens GN=MCM3 PE=2 SV=1	96 kDa	9	8	0
81	P22314|UBA1_HUMAN	Ubiquitin-like modifier-activating enzyme 1 OS=Homo sapiens GN=UBA1 PE=1 SV=3	118 kDa	7	10	0
82	P23526|SAHH_HUMAN	Adenosylhomocysteinase OS=Homo sapiens GN=AHCY PE=1 SV=4	48 kDa	11	6	0
83	P31948|STIP1_HUMAN (+2)	Stress-induced-phosphoprotein 1 OS=Homo sapiens GN=STIP1 PE=1 SV=1	63 kDa	6	11	0
84	Q16555-2|DPYL2_HUMAN	Isoform 2 of Dihydropyrimidinase-related protein 2 OS=Homo sapiens GN=DPYSL2	58 kDa	4	13	0
85	F8W9B9|F8W9B9_HUMAN (+2)	Synaptotagmin-like protein 4 OS=Homo sapiens GN=SYTL4 PE=2 SV=1	76 kDa	4	3	9
86	B0YIW6|B0YIW6_HUMAN (+1)	Archain 1, isoform CRA_a OS=Homo sapiens GN=ARCN1 PE=4 SV=1	62 kDa	10	6	0
87	P09622|DLDH_HUMAN	Dihydrolipoyl dehydrogenase, mitochondrial OS=Homo sapiens GN=DLD PE=1 SV=2	54 kDa	13	3	0
88	P11177-2|ODPB_HUMAN (+1)	Isoform 2 of Pyruvate dehydrogenase E1 component subunit beta, mitochondrial OS=Homo sapiens GN=PDHB	37 kDa	9	7	0
89	P38919|IF4A3_HUMAN	Eukaryotic initiation factor 4A-III OS=Homo sapiens GN=EIF4A3 PE=1 SV=4	47 kDa	11	9	0
90	P67775|PP2AA_HUMAN	Serine/threonine-protein phosphatase 2A catalytic subunit alpha isoform OS=Homo sapiens GN=PPP2CA PE=1 SV=1	36 kDa	9	7	0
91	Q9NSD9|SYFB_HUMAN	Phenylalanine--tRNA ligase beta subunit OS=Homo sapiens GN=FARSB PE=1 SV=3	66 kDa	11	5	0
92	P01871-2|IGHM_HUMAN (+1)	Isoform 2 of Ig mu chain C region OS=Homo sapiens GN=IGHM	52 kDa	1	15	0
93	Q92900-2|RENT1_HUMAN (+1)	Isoform 2 of Regulator of nonsense transcripts 1 OS=Homo sapiens GN=UPF1	123 kDa	7	7	1
94	P30153|2AAA_HUMAN	Serine/threonine-protein phosphatase 2A 65 kDa regulatory subunit A alpha isoform OS=Homo sapiens GN=PPP2R1A PE=1 SV=4	65 kDa	5	9	1
95	Q04637-3|IF4G1_HUMAN (+5)	Isoform B of Eukaryotic translation initiation factor 4 gamma 1 OS=Homo sapiens GN=EIF4G1	172 kDa	5	9	1
96	Q14166|TTL12_HUMAN	Tubulin--tyrosine ligase-like protein 12 OS=Homo sapiens GN=TTLL12 PE=1 SV=2	74 kDa	12	2	1
97	A2A274|A2A274_HUMAN (+1)	Aconitate hydratase, mitochondrial OS=Homo sapiens GN=ACO2 PE=2 SV=1	88 kDa	8	7	0
98	F5GZS6|F5GZS6_HUMAN (+5)	4F2 cell-surface antigen heavy chain OS=Homo sapiens GN=SLC3A2 PE=2 SV=1	65 kDa	6	9	0
99	O00231-2|PSD11_HUMAN (+1)	Isoform 2 of 26S proteasome non-ATPase regulatory subunit 11 OS=Homo sapiens GN=PSMD11	48 kDa	9	6	0
100	P53396-2|ACLY_HUMAN (+1)	Isoform 2 of ATP-citrate synthase OS=Homo sapiens GN=ACLY	120 kDa	6	9	0
101	P54577|SYYC_HUMAN	Tyrosine--tRNA ligase, cytoplasmic OS=Homo sapiens GN=YARS PE=1 SV=4	59 kDa	9	6	0
102	P62333|PRS10_HUMAN	26S protease regulatory subunit 10B OS=Homo sapiens GN=PSMC6 PE=1 SV=1	44 kDa	8	7	0
103	Q13200|PSMD2_HUMAN	26S proteasome non-ATPase regulatory subunit 2 OS=Homo sapiens GN=PSMD2 PE=1 SV=3	100 kDa	4	11	0
104	Q9Y490|TLN1_HUMAN	Talin-1 OS=Homo sapiens GN=TLN1 PE=1 SV=3	270 kDa	4	11	0
105	P24752|THIL_HUMAN	Acetyl-CoA acetyltransferase, mitochondrial OS=Homo sapiens GN=ACAT1 PE=1 SV=1	45 kDa	8	5	1
106	B3KSH1|B3KSH1_HUMAN (+1)	Eukaryotic translation initiation factor 3 subunit F OS=Homo sapiens GN=EIF3F PE=2 SV=1	39 kDa	10	4	0
107	B4DN60|B4DN60_HUMAN (+1)	Asparagine--tRNA ligase, cytoplasmic OS=Homo sapiens GN=NARS PE=2 SV=1	35 kDa	6	8	0
108	O75083|WDR1_HUMAN	WD repeat-containing protein 1 OS=Homo sapiens GN=WDR1 PE=1 SV=4	66 kDa	7	7	0
109	P40939|ECHA_HUMAN	Trifunctional enzyme subunit alpha, mitochondrial OS=Homo sapiens GN=HADHA PE=1 SV=2	83 kDa	9	5	0
110	Q12931|TRAP1_HUMAN (+1)	Heat shock protein 75 kDa, mitochondrial OS=Homo sapiens GN=TRAP1 PE=1 SV=3	80 kDa	7	9	0
111	Q13451|FKBP5_HUMAN	Peptidyl-prolyl cis-trans isomerase FKBP5 OS=Homo sapiens GN=FKBP5 PE=1 SV=2	51 kDa	9	5	0
112	Q13509|TBB3_HUMAN	Tubulin beta-3 chain OS=Homo sapiens GN=TUBB3 PE=1 SV=2	50 kDa	21	35	0
113	Q14118|DAG1_HUMAN	Dystroglycan OS=Homo sapiens GN=DAG1 PE=1 SV=2	97 kDa	8	6	0
114	Q01813|PFKAP_HUMAN	ATP-dependent 6-phosphofructokinase, platelet type OS=Homo sapiens GN=PFKP PE=1 SV=2	?	5	11	0
115	Q92616|GCN1L_HUMAN	Translational activator GCN1 OS=Homo sapiens GN=GCN1L1 PE=1 SV=6	293 kDa	0	13	1
116	O00232-2|PSD12_HUMAN (+1)	Isoform 2 of 26S proteasome non-ATPase regulatory subunit 12 OS=Homo sapiens GN=PSMD12	51 kDa	8	4	1
117	Q9UBT2|SAE2_HUMAN	SUMO-activating enzyme subunit 2 OS=Homo sapiens GN=UBA2 PE=1 SV=2	71 kDa	4	8	1
118	B7Z9I1|B7Z9I1_HUMAN (+3)	Medium-chain-specific acyl-CoA dehydrogenase, mitochondrial OS=Homo sapiens GN=ACADM PE=2 SV=1	42 kDa	9	4	0
119	H3BQK0|H3BQK0_HUMAN	ATP-dependent RNA helicase DDX19B OS=Homo sapiens GN=DDX19B PE=4 SV=1	55 kDa	9	3	0
120	P43686|PRS6B_HUMAN	26S protease regulatory subunit 6B OS=Homo sapiens GN=PSMC4 PE=1 SV=2	47 kDa	9	4	0
121	P49321-4|NASP_HUMAN (+1)	Isoform 4 of Nuclear autoantigenic sperm protein OS=Homo sapiens GN=NASP	78 kDa	8	5	0
122	P49591|SYSC_HUMAN (+1)	Serine--tRNA ligase, cytoplasmic OS=Homo sapiens GN=SARS PE=1 SV=3	59 kDa	6	7	0
123	Q00839|HNRPU_HUMAN	Heterogeneous nuclear ribonucleoprotein U OS=Homo sapiens GN=HNRNPU PE=1 SV=6	91 kDa	6	7	0
124	Q15046|SYK_HUMAN	Lysine--tRNA ligase OS=Homo sapiens GN=KARS PE=1 SV=3	68 kDa	8	5	0
125	Q96QK1|VPS35_HUMAN	Vacuolar protein sorting-associated protein 35 OS=Homo sapiens GN=VPS35 PE=1 SV=2	92 kDa	5	8	0
126	Q9Y230|RUVB2_HUMAN	RuvB-like 2 OS=Homo sapiens GN=RUVBL2 PE=1 SV=3	51 kDa	10	3	0
127	O43837-2|IDH3B_HUMAN (+1)	Isoform A of Isocitrate dehydrogenase [NAD] subunit beta, mitochondrial OS=Homo sapiens GN=IDH3B	42 kDa	11	2	0
128	P09960-2|LKHA4_HUMAN (+1)	Isoform 2 of Leukotriene A-4 hydrolase OS=Homo sapiens GN=LTA4H	60 kDa	2	11	0
129	P42765|THIM_HUMAN	3-ketoacyl-CoA thiolase, mitochondrial OS=Homo sapiens GN=ACAA2 PE=1 SV=2	42 kDa	0	13	0
130	Q14566|MCM6_HUMAN	DNA replication licensing factor MCM6 OS=Homo sapiens GN=MCM6 PE=1 SV=1	93 kDa	6	4	1
131	O43615|TIM44_HUMAN	Mitochondrial import inner membrane translocase subunit TIM44 OS=Homo sapiens GN=TIMM44 PE=1 SV=2	51 kDa	5	7	0
132	O96008|TOM40_HUMAN	Mitochondrial import receptor subunit TOM40 homolog OS=Homo sapiens GN=TOMM40 PE=1 SV=1	38 kDa	4	8	0
133	P36871|PGM1_HUMAN	Phosphoglucomutase-1 OS=Homo sapiens GN=PGM1 PE=1 SV=3	61 kDa	4	8	0
134	P61221|ABCE1_HUMAN	ATP-binding cassette sub-family E member 1 OS=Homo sapiens GN=ABCE1 PE=1 SV=1	67 kDa	5	7	0
135	Q15366-2|PCBP2_HUMAN (+3)	Isoform 2 of Poly(rC)-binding protein 2 OS=Homo sapiens GN=PCBP2	39 kDa	5	7	0
136	P43490|NAMPT_HUMAN	Nicotinamide phosphoribosyltransferase OS=Homo sapiens GN=NAMPT PE=1 SV=1	56 kDa	4	8	0
137	P11766|ADHX_HUMAN	Alcohol dehydrogenase class-3 OS=Homo sapiens GN=ADH5 PE=1 SV=4	40 kDa	7	5	0
138	O14980|XPO1_HUMAN	Exportin-1 OS=Homo sapiens GN=XPO1 PE=1 SV=1	123 kDa	2	10	0
139	P14868|SYDC_HUMAN	Aspartate--tRNA ligase, cytoplasmic OS=Homo sapiens GN=DARS PE=1 SV=2	57 kDa	0	11	1
140	Q01581|HMCS1_HUMAN	Hydroxymethylglutaryl-CoA synthase, cytoplasmic OS=Homo sapiens GN=HMGCS1 PE=1 SV=2	57 kDa	5	5	1
141	P30520|PURA2_HUMAN	Adenylosuccinate synthetase isozyme 2 OS=Homo sapiens GN=ADSS PE=1 SV=3	50 kDa	3	7	1
142	B3KS98|B3KS98_HUMAN (+1)	Eukaryotic translation initiation factor 3 subunit H OS=Homo sapiens GN=EIF3S3 PE=2 SV=1	42 kDa	7	4	0
143	P04844|RPN2_HUMAN	Dolichyl-diphosphooligosaccharide--protein glycosyltransferase subunit 2 OS=Homo sapiens GN=RPN2 PE=1 SV=3	69 kDa	6	5	0
144	P07954-2|FUMH_HUMAN (+1)	Isoform Cytoplasmic of Fumarate hydratase, mitochondrial OS=Homo sapiens GN=FH	50 kDa	6	5	0
145	P31323|KAP3_HUMAN	cAMP-dependent protein kinase type II-beta regulatory subunit OS=Homo sapiens GN=PRKAR2B PE=1 SV=3	46 kDa	4	7	0
146	Q9Y265|RUVB1_HUMAN	RuvB-like 1 OS=Homo sapiens GN=RUVBL1 PE=1 SV=1	50 kDa	7	4	0
147	P60228|EIF3E_HUMAN	Eukaryotic translation initiation factor 3 subunit E OS=Homo sapiens GN=EIF3E PE=1 SV=1	52 kDa	5	6	0
148	Q15365|PCBP1_HUMAN	Poly(rC)-binding protein 1 OS=Homo sapiens GN=PCBP1 PE=1 SV=2	37 kDa	6	11	0
149	P14735|IDE_HUMAN	Insulin-degrading enzyme OS=Homo sapiens GN=IDE PE=1 SV=4	118 kDa	7	4	0
150	P05362|ICAM1_HUMAN	Intercellular adhesion molecule 1 OS=Homo sapiens GN=ICAM1 PE=1 SV=2	58 kDa	9	2	0
151	Q8WUM4-2|PDC6I_HUMAN (+1)	Isoform 2 of Programmed cell death 6-interacting protein OS=Homo sapiens GN=PDCD6IP	97 kDa	3	8	0
152	O60841|IF2P_HUMAN	Eukaryotic translation initiation factor 5B OS=Homo sapiens GN=EIF5B PE=1 SV=4	139 kDa	8	3	0
153	P08107|HSP71_HUMAN	Heat shock 70 kDa protein 1A/1B OS=Homo sapiens GN=HSPA1A PE=1 SV=5	70 kDa	15	0	0
154	Q16822|PCKGM_HUMAN	Phosphoenolpyruvate carboxykinase [GTP], mitochondrial OS=Homo sapiens GN=PCK2 PE=1 SV=3	71 kDa	2	6	2
155	P16885|PLCG2_HUMAN	1-phosphatidylinositol 4,5-bisphosphate phosphodiesterase gamma-2 OS=Homo sapiens GN=PLCG2 PE=1 SV=4	148 kDa	2	5	3
156	E9PCY7|E9PCY7_HUMAN (+2)	Heterogeneous nuclear ribonucleoprotein H OS=Homo sapiens GN=HNRNPH1 PE=2 SV=1	47 kDa	6	3	1
157	O95831-3|AIFM1_HUMAN (+1)	Isoform 3 of Apoptosis-inducing factor 1, mitochondrial OS=Homo sapiens GN=AIFM1	66 kDa	6	3	1
158	D6RFM5|D6RFM5_HUMAN (+2)	Succinate dehydrogenase [ubiquinone] flavoprotein subunit, mitochondrial OS=Homo sapiens GN=SDHA PE=2 SV=1	64 kDa	3	6	1
159	B0QY89|B0QY89_HUMAN (+1)	Eukaryotic translation initiation factor 3 subunit L OS=Homo sapiens GN=EIF3L PE=2 SV=1	71 kDa	5	5	0
160	E9PM69|E9PM69_HUMAN (+2)	26S protease regulatory subunit 6A OS=Homo sapiens GN=PSMC3 PE=2 SV=1	44 kDa	5	5	0
161	F5H4R6|F5H4R6_HUMAN (+8)	Nucleosome assembly protein 1-like 1 OS=Homo sapiens GN=NAP1L1 PE=2 SV=1	45 kDa	4	6	0
162	O94826|TOM70_HUMAN	Mitochondrial import receptor subunit TOM70 OS=Homo sapiens GN=TOMM70A PE=1 SV=1	67 kDa	4	6	0
163	P14324-2|FPPS_HUMAN (+1)	Isoform 2 of Farnesyl pyrophosphate synthase OS=Homo sapiens GN=FDPS	41 kDa	5	5	0
164	P55809|SCOT1_HUMAN	Succinyl-CoA:3-ketoacid coenzyme A transferase 1, mitochondrial OS=Homo sapiens GN=OXCT1 PE=1 SV=1	56 kDa	4	6	0
165	P62191|PRS4_HUMAN	26S protease regulatory subunit 4 OS=Homo sapiens GN=PSMC1 PE=1 SV=1	49 kDa	5	5	0
166	P62195-2|PRS8_HUMAN (+1)	Isoform 2 of 26S protease regulatory subunit 8 OS=Homo sapiens GN=PSMC5	45 kDa	6	4	0
167	Q9UNM6|PSD13_HUMAN	26S proteasome non-ATPase regulatory subunit 13 OS=Homo sapiens GN=PSMD13 PE=1 SV=2	43 kDa	5	5	0
168	A6NJA2|A6NJA2_HUMAN (+3)	Ubiquitin carboxyl-terminal hydrolase OS=Homo sapiens GN=USP14 PE=2 SV=2	51 kDa	4	6	0
169	O95433|AHSA1_HUMAN	Activator of 90 kDa heat shock protein ATPase homolog 1 OS=Homo sapiens GN=AHSA1 PE=1 SV=1	38 kDa	5	5	0
170	B1AHC9|B1AHC9_HUMAN (+1)	X-ray repair cross-complementing protein 6 OS=Homo sapiens GN=XRCC6 PE=2 SV=1	64 kDa	4	6	0
171	F6SBX2|F6SBX2_HUMAN (+1)	Isoleucine--tRNA ligase, mitochondrial OS=Homo sapiens GN=IARS2 PE=2 SV=1	106 kDa	3	7	0
172	Q9UH65|SWP70_HUMAN	Switch-associated protein 70 OS=Homo sapiens GN=SWAP70 PE=1 SV=1	69 kDa	7	3	0
173	P17812|PYRG1_HUMAN	CTP synthase 1 OS=Homo sapiens GN=CTPS1 PE=1 SV=2	67 kDa	3	7	0
174	P61163|ACTZ_HUMAN (+1)	Alpha-centractin OS=Homo sapiens GN=ACTR1A PE=1 SV=1	43 kDa	3	7	0
175	P15170-2|ERF3A_HUMAN (+1)	Isoform 2 of Eukaryotic peptide chain release factor GTP-binding subunit ERF3A OS=Homo sapiens GN=GSPT1	69 kDa	6	4	0
176	Q99615|DNJC7_HUMAN	DnaJ homolog subfamily C member 7 OS=Homo sapiens GN=DNAJC7 PE=1 SV=2	56 kDa	3	7	0
177	F5H006|F5H006_HUMAN (+2)	Processed lymphoid-restricted membrane protein OS=Homo sapiens GN=LRMP PE=2 SV=1	50 kDa	1	7	2
178	P16150|LEUK_HUMAN	Leukosialin OS=Homo sapiens GN=SPN PE=1 SV=1	40 kDa	1	9	0
179	Q86VP6|CAND1_HUMAN	Cullin-associated NEDD8-dissociated protein 1 OS=Homo sapiens GN=CAND1 PE=1 SV=2	136 kDa	0	10	0
180	Q15008|PSMD6_HUMAN (+1)	26S proteasome non-ATPase regulatory subunit 6 OS=Homo sapiens GN=PSMD6 PE=1 SV=1	46 kDa	3	5	1
181	E9PLK3|E9PLK3_HUMAN (+1)	Puromycin-sensitive aminopeptidase OS=Homo sapiens GN=NPEPPS PE=2 SV=1	103 kDa	4	5	0
182	P05534|1A24_HUMAN	HLA class I histocompatibility antigen, A-24 alpha chain OS=Homo sapiens GN=HLA-A PE=1 SV=2	41 kDa	4	5	0
183	P55084-2|ECHB_HUMAN (+1)	Isoform 2 of Trifunctional enzyme subunit beta, mitochondrial OS=Homo sapiens GN=HADHB	49 kDa	5	4	0
184	Q06203|PUR1_HUMAN	Amidophosphoribosyltransferase OS=Homo sapiens GN=PPAT PE=1 SV=1	57 kDa	4	5	0
185	Q16543|CDC37_HUMAN	Hsp90 co-chaperone Cdc37 OS=Homo sapiens GN=CDC37 PE=1 SV=1	44 kDa	4	5	0
186	O00154-4|BACH_HUMAN (+3)	Isoform 4 of Cytosolic acyl coenzyme A thioester hydrolase OS=Homo sapiens GN=ACOT7	37 kDa	4	5	0
187	Q9UJZ1-2|STML2_HUMAN (+1)	Isoform 2 of Stomatin-like protein 2, mitochondrial OS=Homo sapiens GN=STOML2	33 kDa	4	5	0
188	F8VU65|F8VU65_HUMAN (+1)	60S acidic ribosomal protein P0 (Fragment) OS=Homo sapiens GN=RPLP0 PE=3 SV=1	27 kDa	5	4	0
189	F5H5D3|F5H5D3_HUMAN (+1)	Tubulin alpha-1C chain OS=Homo sapiens GN=TUBA1C PE=2 SV=1	58 kDa	35	44	0
190	Q92973-2|TNPO1_HUMAN (+1)	Isoform 2 of Transportin-1 OS=Homo sapiens GN=TNPO1	101 kDa	5	4	0
191	P50453|SPB9_HUMAN	Serpin B9 OS=Homo sapiens GN=SERPINB9 PE=1 SV=1	42 kDa	3	6	0
192	A6NC17|A6NC17_HUMAN (+1)	Methionine--tRNA ligase, cytoplasmic OS=Homo sapiens GN=MARS PE=2 SV=3	72 kDa	4	5	0
193	B1AHB1|B1AHB1_HUMAN (+1)	DNA replication licensing factor MCM5 OS=Homo sapiens GN=MCM5 PE=3 SV=1	78 kDa	3	6	0
194	P08559-2|ODPA_HUMAN (+3)	Isoform 2 of Pyruvate dehydrogenase E1 component subunit alpha, somatic form, mitochondrial OS=Homo sapiens GN=PDHA1	44 kDa	7	2	0
195	P31930|QCR1_HUMAN	Cytochrome b-c1 complex subunit 1, mitochondrial OS=Homo sapiens GN=UQCRC1 PE=1 SV=3	53 kDa	4	5	0
196	B4DQJ8|B4DQJ8_HUMAN (+1)	6-phosphogluconate dehydrogenase, decarboxylating OS=Homo sapiens GN=PGD PE=2 SV=1	52 kDa	8	1	0
197	P55072|TERA_HUMAN	Transitional endoplasmic reticulum ATPase OS=Homo sapiens GN=VCP PE=1 SV=4	89 kDa	7	2	0
198	F5GWY5|F5GWY5_HUMAN (+3)	Podocalyxin OS=Homo sapiens GN=PODXL PE=2 SV=1	59 kDa	7	2	0
199	E9PC15|E9PC15_HUMAN (+1)	Acylglycerol kinase, mitochondrial OS=Homo sapiens GN=AGK PE=2 SV=1	44 kDa	7	1	1
200	O60763-2|USO1_HUMAN (+1)	Isoform 2 of General vesicular transport factor p115 OS=Homo sapiens GN=USO1	109 kDa	0	7	1
201	P46940|IQGA1_HUMAN	Ras GTPase-activating-like protein IQGAP1 OS=Homo sapiens GN=IQGAP1 PE=1 SV=1	189 kDa	0	7	1
202	O75874|IDHC_HUMAN	Isocitrate dehydrogenase [NADP] cytoplasmic OS=Homo sapiens GN=IDH1 PE=1 SV=2	47 kDa	0	8	0
203	B4E049|B4E049_HUMAN	Septin-6 OS=Homo sapiens GN=SEPT6 PE=2 SV=1	43 kDa	2	4	2
204	P22102|PUR2_HUMAN	Trifunctional purine biosynthetic protein adenosine-3 OS=Homo sapiens GN=GART PE=1 SV=1	108 kDa	3	4	1
205	A6NEM2|A6NEM2_HUMAN (+1)	HCF N-terminal chain 5 OS=Homo sapiens GN=HCFC1 PE=2 SV=2	213 kDa	2	4	2
206	B4E363|B4E363_HUMAN (+2)	Phenylalanine--tRNA ligase alpha subunit OS=Homo sapiens GN=FARSA PE=2 SV=1	54 kDa	4	4	0
207	F8VYE8|F8VYE8_HUMAN (+3)	Serine/threonine-protein phosphatase OS=Homo sapiens GN=PPP1CC PE=2 SV=1	35 kDa	4	4	0
208	O60488-2|ACSL4_HUMAN (+1)	Isoform Short of Long-chain-fatty-acid--CoA ligase 4 OS=Homo sapiens GN=ACSL4	74 kDa	5	3	0
209	Q15393|SF3B3_HUMAN	Splicing factor 3B subunit 3 OS=Homo sapiens GN=SF3B3 PE=1 SV=4	136 kDa	4	4	0
210	P55884-2|EIF3B_HUMAN (+1)	Isoform 2 of Eukaryotic translation initiation factor 3 subunit B OS=Homo sapiens GN=EIF3B	99 kDa	5	3	0
211	B7Z7P8|B7Z7P8_HUMAN (+2)	Eukaryotic peptide chain release factor subunit 1 OS=Homo sapiens GN=ETF1 PE=2 SV=1	47 kDa	4	4	0
212	Q9UBS4|DJB11_HUMAN	DnaJ homolog subfamily B member 11 OS=Homo sapiens GN=DNAJB11 PE=1 SV=1	41 kDa	3	5	0
213	Q07960|RHG01_HUMAN	Rho GTPase-activating protein 1 OS=Homo sapiens GN=ARHGAP1 PE=1 SV=1	50 kDa	4	4	0
214	P04843|RPN1_HUMAN	Dolichyl-diphosphooligosaccharide--protein glycosyltransferase subunit 1 OS=Homo sapiens GN=RPN1 PE=1 SV=1	69 kDa	6	2	0
215	Q15758|AAAT_HUMAN	Neutral amino acid transporter B(0) OS=Homo sapiens GN=SLC1A5 PE=1 SV=2	57 kDa	3	5	0
216	F5H335|F5H335_HUMAN (+1)	Eukaryotic translation initiation factor 3 subunit A OS=Homo sapiens GN=EIF3A PE=2 SV=1	163 kDa	4	4	0
217	P11413-2|G6PD_HUMAN (+2)	Isoform Long of Glucose-6-phosphate 1-dehydrogenase OS=Homo sapiens GN=G6PD	64 kDa	7	1	0
218	F8W6L6|F8W6L6_HUMAN (+5)	Myosin-10 OS=Homo sapiens GN=MYH10 PE=2 SV=1	231 kDa	4	2	2
219	B7Z2A4|B7Z2A4_HUMAN (+5)	Receptor-type tyrosine-protein phosphatase OS=Homo sapiens GN=PTPRA PE=2 SV=1	92 kDa	2	5	1
220	H0Y8E6|H0Y8E6_HUMAN (+1)	DNA replication licensing factor MCM2 (Fragment) OS=Homo sapiens GN=MCM2 PE=3 SV=1	94 kDa	1	6	1
221	P07195|LDHB_HUMAN	L-lactate dehydrogenase B chain OS=Homo sapiens GN=LDHB PE=1 SV=2	37 kDa	2	8	0
222	B7Z3I5|B7Z3I5_HUMAN (+2)	Ena/VASP-like protein OS=Homo sapiens GN=EVL PE=2 SV=1	42 kDa	0	8	0
223	O00116|ADAS_HUMAN	Alkyldihydroxyacetonephosphate synthase, peroxisomal OS=Homo sapiens GN=AGPS PE=1 SV=1	73 kDa	2	4	1
224	O43143|DHX15_HUMAN	Putative pre-mRNA-splicing factor ATP-dependent RNA helicase DHX15 OS=Homo sapiens GN=DHX15 PE=1 SV=2	91 kDa	5	1	1
225	P17858|PFKAL_HUMAN	ATP-dependent 6-phosphofructokinase, liver type OS=Homo sapiens GN=PFKL PE=1 SV=6	?	4	6	1
226	P68366|TBA4A_HUMAN (+1)	Tubulin alpha-4A chain OS=Homo sapiens GN=TUBA4A PE=1 SV=1	50 kDa	31	44	0
227	Q9UBB4|ATX10_HUMAN	Ataxin-10 OS=Homo sapiens GN=ATXN10 PE=1 SV=1	53 kDa	3	4	0
228	P49915|GUAA_HUMAN	GMP synthase [glutamine-hydrolyzing] OS=Homo sapiens GN=GMPS PE=1 SV=1	77 kDa	3	4	0
229	P51553|IDH3G_HUMAN	Isocitrate dehydrogenase [NAD] subunit gamma, mitochondrial OS=Homo sapiens GN=IDH3G PE=1 SV=1	43 kDa	4	3	0
230	P54687-2|BCAT1_HUMAN (+4)	Isoform 2 of Branched-chain-amino-acid aminotransferase, cytosolic OS=Homo sapiens GN=BCAT1	36 kDa	3	4	0
231	P23396|RS3_HUMAN	40S ribosomal protein S3 OS=Homo sapiens GN=RPS3 PE=1 SV=2	27 kDa	4	3	0
232	Q15084-2|PDIA6_HUMAN (+4)	Isoform 2 of Protein disulfide-isomerase A6 OS=Homo sapiens GN=PDIA6	54 kDa	3	4	0
233	H7C5W9|H7C5W9_HUMAN (+5)	Sarcoplasmic/endoplasmic reticulum calcium ATPase 2 (Fragment) OS=Homo sapiens GN=ATP2A2 PE=3 SV=1	103 kDa	2	5	0
234	P26640|SYVC_HUMAN	Valine--tRNA ligase OS=Homo sapiens GN=VARS PE=1 SV=4	140 kDa	2	4	0
235	E9PHA6|E9PHA6_HUMAN (+1)	DNA mismatch repair protein Msh2 OS=Homo sapiens GN=MSH2 PE=2 SV=1	103 kDa	2	5	0
236	P45974-2|UBP5_HUMAN (+1)	Isoform Short of Ubiquitin carboxyl-terminal hydrolase 5 OS=Homo sapiens GN=USP5	93 kDa	3	4	0
237	O95373|IPO7_HUMAN	Importin-7 OS=Homo sapiens GN=IPO7 PE=1 SV=1	120 kDa	5	2	0
238	H7BYH4|H7BYH4_HUMAN (+1)	Superoxide dismutase [Cu-Zn] OS=Homo sapiens GN=SOD1 PE=2 SV=1	14 kDa	0	2	5
239	Q9UBE0|SAE1_HUMAN	SUMO-activating enzyme subunit 1 OS=Homo sapiens GN=SAE1 PE=1 SV=1	38 kDa	2	5	0
240	P23381-2|SYWC_HUMAN (+1)	Isoform 2 of Tryptophan--tRNA ligase, cytoplasmic OS=Homo sapiens GN=WARS	48 kDa	3	4	0
241	Q96Q11-2|TRNT1_HUMAN (+1)	Isoform 2 of CCA tRNA nucleotidyltransferase 1, mitochondrial OS=Homo sapiens GN=TRNT1	48 kDa	2	5	0
242	Q9UG63-2|ABCF2_HUMAN (+1)	Isoform 2 of ATP-binding cassette sub-family F member 2 OS=Homo sapiens GN=ABCF2	72 kDa	4	2	1
243	P47914|RL29_HUMAN	60S ribosomal protein L29 OS=Homo sapiens GN=RPL29 PE=1 SV=2	18 kDa	3	0	4
244	F5H658|F5H658_HUMAN (+1)	ATP-dependent RNA helicase DHX8 OS=Homo sapiens GN=DHX8 PE=2 SV=1	134 kDa	2	2	3
245	H0YL72|H0YL72_HUMAN (+1)	Isocitrate dehydrogenase [NAD] subunit alpha, mitochondrial OS=Homo sapiens GN=IDH3A PE=2 SV=1	36 kDa	6	1	0
246	P61160-2|ARP2_HUMAN (+1)	Isoform 2 of Actin-related protein 2 OS=Homo sapiens GN=ACTR2	45 kDa	1	6	0
247	P05091|ALDH2_HUMAN	Aldehyde dehydrogenase, mitochondrial OS=Homo sapiens GN=ALDH2 PE=1 SV=2	56 kDa	0	6	1
248	P61158|ARP3_HUMAN	Actin-related protein 3 OS=Homo sapiens GN=ACTR3 PE=1 SV=3	47 kDa	0	7	0
249	Q08211|DHX9_HUMAN	ATP-dependent RNA helicase A OS=Homo sapiens GN=DHX9 PE=1 SV=4	141 kDa	0	7	0
250	Q7KZF4|SND1_HUMAN	Staphylococcal nuclease domain-containing protein 1 OS=Homo sapiens GN=SND1 PE=1 SV=1	102 kDa	0	7	0
251	Q13423|NNTM_HUMAN	NAD(P) transhydrogenase, mitochondrial OS=Homo sapiens GN=NNT PE=1 SV=3	114 kDa	0	7	0
252	Q5D862|FILA2_HUMAN	Filaggrin-2 OS=Homo sapiens GN=FLG2 PE=1 SV=1	248 kDa	2	3	1
253	P48147|PPCE_HUMAN	Prolyl endopeptidase OS=Homo sapiens GN=PREP PE=1 SV=2	81 kDa	3	1	2
254	Q9BZZ5|API5_HUMAN	Apoptosis inhibitor 5 OS=Homo sapiens GN=API5 PE=1 SV=3	59 kDa	1	3	2
255	P19338|NUCL_HUMAN	Nucleolin OS=Homo sapiens GN=NCL PE=1 SV=3	77 kDa	1	2	3
256	Q96RP9-2|EFGM_HUMAN (+1)	Isoform 2 of Elongation factor G, mitochondrial OS=Homo sapiens GN=GFM1	86 kDa	2	3	1
257	Q5FWF5-2|ESCO1_HUMAN (+1)	Isoform 2 of N-acetyltransferase ESCO1 OS=Homo sapiens GN=ESCO1	79 kDa	2	3	1
258	H0Y8W2|H0Y8W2_HUMAN (+4)	Guanine nucleotide-binding protein subunit beta-2-like 1 (Fragment) OS=Homo sapiens GN=GNB2L1 PE=4 SV=1	30 kDa	2	3	1
259	I3L0N3|I3L0N3_HUMAN (+1)	Vesicle-fusing ATPase OS=Homo sapiens GN=NSF PE=2 SV=1	82 kDa	2	2	1
260	Q9ULA0|DNPEP_HUMAN	Aspartyl aminopeptidase OS=Homo sapiens GN=DNPEP PE=1 SV=1	52 kDa	3	2	1
261	Q8N163-2|CCAR2_HUMAN (+1)	Isoform 2 of Cell cycle and apoptosis regulator protein 2 OS=Homo sapiens GN=CCAR2	103 kDa	4	1	1
262	B4DJV2|B4DJV2_HUMAN (+1)	Citrate synthase OS=Homo sapiens GN=CS PE=2 SV=1	50 kDa	3	3	0
263	O14929|HAT1_HUMAN	Histone acetyltransferase type B catalytic subunit OS=Homo sapiens GN=HAT1 PE=1 SV=1	50 kDa	3	3	0
264	E9PKG1|E9PKG1_HUMAN (+5)	Protein arginine N-methyltransferase 1 OS=Homo sapiens GN=PRMT1 PE=2 SV=1	38 kDa	4	2	0
265	P35613-2|BASI_HUMAN (+1)	Isoform 2 of Basigin OS=Homo sapiens GN=BSG	29 kDa	4	2	0
266	P41240|CSK_HUMAN	Tyrosine-protein kinase CSK OS=Homo sapiens GN=CSK PE=1 SV=1	51 kDa	4	2	0
267	P61978-2|HNRPK_HUMAN (+3)	Isoform 2 of Heterogeneous nuclear ribonucleoprotein K OS=Homo sapiens GN=HNRNPK	51 kDa	2	4	0
268	Q99733-2|NP1L4_HUMAN (+1)	Isoform 2 of Nucleosome assembly protein 1-like 4 OS=Homo sapiens GN=NAP1L4	44 kDa	2	4	0
269	Q15019-2|SEPT2_HUMAN (+2)	Isoform 2 of Septin-2 OS=Homo sapiens GN=SEPT2	45 kDa	3	3	0
270	B7Z4A7|B7Z4A7_HUMAN (+1)	Protein EVI2B OS=Homo sapiens GN=EVI2B PE=2 SV=1	51 kDa	4	2	0
271	Q9Y266|NUDC_HUMAN	Nuclear migration protein nudC OS=Homo sapiens GN=NUDC PE=1 SV=1	38 kDa	3	3	0
272	Q13885|TBB2A_HUMAN	Tubulin beta-2A chain OS=Homo sapiens GN=TUBB2A PE=1 SV=1	50 kDa	32	48	0
273	P33176|KINH_HUMAN	Kinesin-1 heavy chain OS=Homo sapiens GN=KIF5B PE=1 SV=1	110 kDa	2	4	0
274	P14598|NCF1_HUMAN	Neutrophil cytosol factor 1 OS=Homo sapiens GN=NCF1 PE=1 SV=3	45 kDa	5	1	0
275	Q9BXJ9|NAA15_HUMAN	N-alpha-acetyltransferase 15, NatA auxiliary subunit OS=Homo sapiens GN=NAA15 PE=1 SV=1	101 kDa	1	5	0
276	A8MVQ3|A8MVQ3_HUMAN (+4)	Cysteine--tRNA ligase, cytoplasmic OS=Homo sapiens GN=CARS PE=2 SV=1	84 kDa	3	3	0
277	B4DTU4|B4DTU4_HUMAN (+4)	DNA ligase OS=Homo sapiens GN=LIG1 PE=2 SV=1	98 kDa	3	3	0
278	B7Z1R5|B7Z1R5_HUMAN	V-type proton ATPase catalytic subunit A OS=Homo sapiens GN=ATP6V1A PE=2 SV=1	65 kDa	4	2	0
279	Q14008-3|CKAP5_HUMAN	Isoform 3 of Cytoskeleton-associated protein 5 OS=Homo sapiens GN=CKAP5	226 kDa	2	3	1
280	Q9NZ08-2|ERAP1_HUMAN (+1)	Isoform 2 of Endoplasmic reticulum aminopeptidase 1 OS=Homo sapiens GN=ERAP1	108 kDa	0	5	1
281	F8W726|F8W726_HUMAN (+5)	Ubiquitin-associated protein 2-like OS=Homo sapiens GN=UBAP2L PE=2 SV=1	113 kDa	5	0	1
282	E7EUC7|E7EUC7_HUMAN (+2)	UTP--glucose-1-phosphate uridylyltransferase OS=Homo sapiens GN=UGP2 PE=2 SV=1	58 kDa	1	5	0
283	E7EN95|E7EN95_HUMAN (+7)	Filamin-B OS=Homo sapiens GN=FLNB PE=2 SV=1	256 kDa	5	0	1
284	O43592|XPOT_HUMAN	Exportin-T OS=Homo sapiens GN=XPOT PE=1 SV=2	110 kDa	0	5	0
285	Q86UX7-2|URP2_HUMAN (+1)	Isoform 2 of Fermitin family homolog 3 OS=Homo sapiens GN=FERMT3	75 kDa	0	6	0
286	P15924|DESP_HUMAN	Desmoplakin OS=Homo sapiens GN=DSP PE=1 SV=3	332 kDa	0	0	6
287	Q96KP4-2|CNDP2_HUMAN (+1)	Isoform 2 of Cytosolic non-specific dipeptidase OS=Homo sapiens GN=CNDP2	44 kDa	3	1	1
288	F5GX68|F5GX68_HUMAN (+2)	Cytosine-specific methyltransferase OS=Homo sapiens GN=DNMT1 PE=2 SV=1	183 kDa	3	1	1
289	Q3LXA3|DHAK_HUMAN	Bifunctional ATP-dependent dihydroxyacetone kinase/FAD-AMP lyase (cyclizing) OS=Homo sapiens GN=DAK PE=1 SV=2	59 kDa	2	3	0
290	P13489|RINI_HUMAN	Ribonuclease inhibitor OS=Homo sapiens GN=RNH1 PE=1 SV=2	50 kDa	2	3	0
291	B4DLW8|B4DLW8_HUMAN (+2)	Probable ATP-dependent RNA helicase DDX5 OS=Homo sapiens GN=DDX5 PE=2 SV=1	61 kDa	3	2	0
292	F5GWY2|F5GWY2_HUMAN (+2)	Phosphoribosylaminoimidazolecarboxamide formyltransferase OS=Homo sapiens GN=ATIC PE=2 SV=1	59 kDa	2	3	0
293	P34896-2|GLYC_HUMAN (+2)	Isoform 2 of Serine hydroxymethyltransferase, cytosolic OS=Homo sapiens GN=SHMT1	49 kDa	3	3	0
294	Q02413|DSG1_HUMAN	Desmoglein-1 OS=Homo sapiens GN=DSG1 PE=1 SV=2	114 kDa	0	4	2
295	Q9UQ80|PA2G4_HUMAN	Proliferation-associated protein 2G4 OS=Homo sapiens GN=PA2G4 PE=1 SV=3	44 kDa	2	3	0
296	B4E0Y9|B4E0Y9_HUMAN (+3)	Serine/threonine-protein kinase MST4 OS=Homo sapiens GN=MST4 PE=2 SV=1	49 kDa	3	2	0
297	P35998|PRS7_HUMAN	26S protease regulatory subunit 7 OS=Homo sapiens GN=PSMC2 PE=1 SV=3	49 kDa	2	3	0
298	E7ERF4|E7ERF4_HUMAN (+2)	Adenylosuccinate lyase OS=Homo sapiens GN=ADSL PE=2 SV=1	56 kDa	3	2	0
299	Q6UB35|C1TM_HUMAN	Monofunctional C1-tetrahydrofolate synthase, mitochondrial OS=Homo sapiens GN=MTHFD1L PE=1 SV=1	106 kDa	3	2	0
300	E9PPQ5|E9PPQ5_HUMAN (+2)	Cysteine and histidine-rich domain-containing protein 1 OS=Homo sapiens GN=CHORDC1 PE=2 SV=1	21 kDa	2	3	0
301	Q15459|SF3A1_HUMAN	Splicing factor 3A subunit 1 OS=Homo sapiens GN=SF3A1 PE=1 SV=1	89 kDa	3	2	0
302	P07384|CAN1_HUMAN	Calpain-1 catalytic subunit OS=Homo sapiens GN=CAPN1 PE=1 SV=1	82 kDa	3	2	0
303	C9JW69|C9JW69_HUMAN (+2)	Regulator of chromosome condensation (Fragment) OS=Homo sapiens GN=RCC1 PE=2 SV=1	40 kDa	4	1	0
304	P35520-2|CBS_HUMAN (+1)	Isoform 2 of Cystathionine beta-synthase OS=Homo sapiens GN=CBS	62 kDa	1	4	0
305	P55036|PSMD4_HUMAN (+1)	26S proteasome non-ATPase regulatory subunit 4 OS=Homo sapiens GN=PSMD4 PE=1 SV=1	41 kDa	1	4	0
306	Q7L2H7|EIF3M_HUMAN	Eukaryotic translation initiation factor 3 subunit M OS=Homo sapiens GN=EIF3M PE=1 SV=1	43 kDa	1	4	0
307	Q9Y5P6-2|GMPPB_HUMAN (+1)	Isoform 2 of Mannose-1-phosphate guanyltransferase beta OS=Homo sapiens GN=GMPPB	43 kDa	2	3	0
308	B4DQ14|B4DQ14_HUMAN (+2)	Eukaryotic translation initiation factor 2A OS=Homo sapiens GN=EIF2A PE=2 SV=1	62 kDa	2	3	0
309	B4DJ81|B4DJ81_HUMAN (+5)	NADH-ubiquinone oxidoreductase 75 kDa subunit, mitochondrial OS=Homo sapiens GN=NDUFS1 PE=2 SV=1	67 kDa	4	1	0
310	Q9BWD1|THIC_HUMAN	Acetyl-CoA acetyltransferase, cytosolic OS=Homo sapiens GN=ACAT2 PE=1 SV=2	41 kDa	1	4	0
311	H7C3P9|H7C3P9_HUMAN (+2)	COP9 signalosome complex subunit 3 OS=Homo sapiens GN=COPS3 PE=2 SV=2	39 kDa	2	3	0
312	O00429-4|DNM1L_HUMAN	Isoform 3 of Dynamin-1-like protein OS=Homo sapiens GN=DNM1L	78 kDa	1	3	1
313	E9PDQ8|E9PDQ8_HUMAN (+2)	Succinyl-CoA ligase [GDP-forming] subunit beta, mitochondrial OS=Homo sapiens GN=SUCLG2 PE=2 SV=1	41 kDa	2	3	0
314	P62424|RL7A_HUMAN	60S ribosomal protein L7a OS=Homo sapiens GN=RPL7A PE=1 SV=2	30 kDa	1	4	0
315	Q9NZI8|IF2B1_HUMAN	Insulin-like growth factor 2 mRNA-binding protein 1 OS=Homo sapiens GN=IGF2BP1 PE=1 SV=2	63 kDa	0	2	3
316	O15355|PPM1G_HUMAN	Protein phosphatase 1G OS=Homo sapiens GN=PPM1G PE=1 SV=1	59 kDa	4	1	0
317	Q86UY0|Q86UY0_HUMAN (+2)	TXNDC5 protein OS=Homo sapiens GN=TXNDC5 PE=2 SV=1	40 kDa	0	4	1
318	Q7L1Q6-3|BZW1_HUMAN (+2)	Isoform 3 of Basic leucine zipper and W2 domain-containing protein 1 OS=Homo sapiens GN=BZW1	51 kDa	2	3	0
319	P21333-2|FLNA_HUMAN (+2)	Isoform 2 of Filamin-A OS=Homo sapiens GN=FLNA	280 kDa	2	0	4
320	O00629|IMA3_HUMAN	Importin subunit alpha-3 OS=Homo sapiens GN=KPNA4 PE=1 SV=1	58 kDa	1	4	0
321	Q13618-2|CUL3_HUMAN (+1)	Isoform 2 of Cullin-3 OS=Homo sapiens GN=CUL3	86 kDa	1	4	0
322	Q14683|SMC1A_HUMAN	Structural maintenance of chromosomes protein 1A OS=Homo sapiens GN=SMC1A PE=1 SV=2	143 kDa	3	1	1
323	E9PB90|E9PB90_HUMAN (+1)	Hexokinase-2 OS=Homo sapiens GN=HK2 PE=2 SV=1	99 kDa	0	5	1
324	E9PJ81|E9PJ81_HUMAN (+3)	UBX domain-containing protein 1 (Fragment) OS=Homo sapiens GN=UBXN1 PE=2 SV=1	33 kDa	4	1	0
325	F8W8S0|F8W8S0_HUMAN (+6)	Cytoplasmic dynein 1 intermediate chain 2 OS=Homo sapiens GN=DYNC1I2 PE=2 SV=1	71 kDa	1	4	0
326	Q8IYS1|P20D2_HUMAN	Peptidase M20 domain-containing protein 2 OS=Homo sapiens GN=PM20D2 PE=1 SV=2	48 kDa	4	1	0
327	O75746|CMC1_HUMAN	Calcium-binding mitochondrial carrier protein Aralar1 OS=Homo sapiens GN=SLC25A12 PE=1 SV=2	75 kDa	0	3	2
328	E7ENR4|E7ENR4_HUMAN (+4)	Hexokinase-1 OS=Homo sapiens GN=HK1 PE=2 SV=1	106 kDa	1	4	0
329	Q9Y3Z3|SAMH1_HUMAN	Deoxynucleoside triphosphate triphosphohydrolase SAMHD1 OS=Homo sapiens GN=SAMHD1 PE=1 SV=2	72 kDa	5	0	0
330	P48735|IDHP_HUMAN	Isocitrate dehydrogenase [NADP], mitochondrial OS=Homo sapiens GN=IDH2 PE=1 SV=2	51 kDa	5	0	0
331	Q06210-2|GFPT1_HUMAN (+1)	Isoform 2 of Glutamine--fructose-6-phosphate aminotransferase [isomerizing] 1 OS=Homo sapiens GN=GFPT1	77 kDa	0	5	0
332	Q9Y5B9|SP16H_HUMAN	FACT complex subunit SPT16 OS=Homo sapiens GN=SUPT16H PE=1 SV=1	120 kDa	0	4	0
333	P06748-2|NPM_HUMAN (+2)	Isoform 2 of Nucleophosmin OS=Homo sapiens GN=NPM1	29 kDa	2	1	1
334	Q06830|PRDX1_HUMAN	Peroxiredoxin-1 OS=Homo sapiens GN=PRDX1 PE=1 SV=1	22 kDa	2	1	1
335	P26639-2|SYTC_HUMAN (+1)	Isoform 2 of Threonine--tRNA ligase, cytoplasmic OS=Homo sapiens GN=TARS	87 kDa	1	2	1
336	O60506-3|HNRPQ_HUMAN (+2)	Isoform 3 of Heterogeneous nuclear ribonucleoprotein Q OS=Homo sapiens GN=SYNCRIP	63 kDa	1	2	1
337	F5H4L7|F5H4L7_HUMAN (+2)	Vacuolar protein sorting-associated protein 26A OS=Homo sapiens GN=VPS26A PE=2 SV=1	37 kDa	2	2	0
338	P35250-2|RFC2_HUMAN (+1)	Isoform 2 of Replication factor C subunit 2 OS=Homo sapiens GN=RFC2	35 kDa	2	2	0
339	Q6YN16-2|HSDL2_HUMAN (+1)	Isoform 2 of Hydroxysteroid dehydrogenase-like protein 2 OS=Homo sapiens GN=HSDL2	37 kDa	2	2	0
340	A6NE09|A6NE09_HUMAN (+2)	40S ribosomal protein SA OS=Homo sapiens GN=RPSAP58 PE=3 SV=1	33 kDa	2	2	0
341	F5GY55|F5GY55_HUMAN (+1)	Uncharacterized protein OS=Homo sapiens GN=DDB1 PE=4 SV=1	122 kDa	2	2	0
342	E5RIM3|E5RIM3_HUMAN (+1)	Phospholipase A-2-activating protein OS=Homo sapiens GN=PLAA PE=2 SV=1	67 kDa	2	2	0
343	B4DN45|B4DN45_HUMAN (+1)	S-adenosylmethionine synthase OS=Homo sapiens GN=MAT2A PE=2 SV=1	33 kDa	2	2	0
344	P53597|SUCA_HUMAN	Succinyl-CoA ligase [ADP/GDP-forming] subunit alpha, mitochondrial OS=Homo sapiens GN=SUCLG1 PE=1 SV=4	36 kDa	2	2	0
345	P52907|CAZA1_HUMAN	F-actin-capping protein subunit alpha-1 OS=Homo sapiens GN=CAPZA1 PE=1 SV=3	33 kDa	2	2	0
346	Q08J23-2|NSUN2_HUMAN (+1)	Isoform 2 of tRNA (cytosine(34)-C(5))-methyltransferase OS=Homo sapiens GN=NSUN2	82 kDa	3	1	0
347	Q9BXW7-2|CECR5_HUMAN (+1)	Isoform 1 of Cat eye syndrome critical region protein 5 OS=Homo sapiens GN=CECR5	44 kDa	3	1	0
348	Q01518-2|CAP1_HUMAN (+9)	Isoform 2 of Adenylyl cyclase-associated protein 1 OS=Homo sapiens GN=CAP1	52 kDa	1	3	0
349	Q8TCT9-5|HM13_HUMAN (+1)	Isoform 5 of Minor histocompatibility antigen H13 OS=Homo sapiens GN=HM13	37 kDa	2	2	0
350	P04899-4|GNAI2_HUMAN (+1)	Isoform sGi2 of Guanine nucleotide-binding protein G(i) subunit alpha-2 OS=Homo sapiens GN=GNAI2	42 kDa	1	3	0
351	B4E022|B4E022_HUMAN (+2)	Transketolase OS=Homo sapiens GN=TKT PE=2 SV=1	63 kDa	1	3	0
352	B4DP47|B4DP47_HUMAN (+2)	2-oxoisovalerate dehydrogenase subunit alpha, mitochondrial OS=Homo sapiens GN=BCKDHA PE=2 SV=1	51 kDa	2	2	0
353	P49770|EI2BB_HUMAN	Translation initiation factor eIF-2B subunit beta OS=Homo sapiens GN=EIF2B2 PE=1 SV=3	39 kDa	1	3	0
354	B0QZ18|B0QZ18_HUMAN (+1)	Copine-1 OS=Homo sapiens GN=CPNE1 PE=4 SV=1	60 kDa	2	2	0
355	P53985|MOT1_HUMAN	Monocarboxylate transporter 1 OS=Homo sapiens GN=SLC16A1 PE=1 SV=3	54 kDa	1	3	0
356	P36957|ODO2_HUMAN	Dihydrolipoyllysine-residue succinyltransferase component of 2-oxoglutarate dehydrogenase complex, mitochondrial OS=Homo sapiens GN=DLST PE=1 SV=4	49 kDa	1	3	0
357	E7EWT1|E7EWT1_HUMAN (+1)	Dolichyl-diphosphooligosaccharide--protein glycosyltransferase 48 kDa subunit OS=Homo sapiens GN=DDOST PE=2 SV=1	47 kDa	2	2	0
358	O94874-2|UFL1_HUMAN (+1)	Isoform 2 of E3 UFM1-protein ligase 1 OS=Homo sapiens GN=UFL1	82 kDa	2	2	0
359	O94973-2|AP2A2_HUMAN (+2)	Isoform 2 of AP-2 complex subunit alpha-2 OS=Homo sapiens GN=AP2A2	104 kDa	0	2	2
360	F5H6V2|F5H6V2_HUMAN (+1)	Phosphoglucomutase-2 OS=Homo sapiens GN=PGM2 PE=2 SV=1	51 kDa	2	2	0
361	B4DER1|B4DER1_HUMAN (+3)	Leucine--tRNA ligase, cytoplasmic OS=Homo sapiens GN=LARS PE=2 SV=1	131 kDa	1	2	1
362	Q13619|CUL4A_HUMAN	Cullin-4A OS=Homo sapiens GN=CUL4A PE=1 SV=3	88 kDa	1	3	0
363	P33993|MCM7_HUMAN	DNA replication licensing factor MCM7 OS=Homo sapiens GN=MCM7 PE=1 SV=4	81 kDa	1	3	0
364	H0Y394|H0Y394_HUMAN (+2)	Vigilin (Fragment) OS=Homo sapiens GN=HDLBP PE=4 SV=1	109 kDa	2	2	0
365	J3KN16|J3KN16_HUMAN (+1)	Proteasome-associated protein ECM29 homolog OS=Homo sapiens GN=KIAA0368 PE=2 SV=1	224 kDa	2	2	0
366	O15067|PUR4_HUMAN	Phosphoribosylformylglycinamidine synthase OS=Homo sapiens GN=PFAS PE=1 SV=4	145 kDa	3	0	1
367	Q13564-2|ULA1_HUMAN (+3)	Isoform 2 of NEDD8-activating enzyme E1 regulatory subunit OS=Homo sapiens GN=NAE1	59 kDa	2	1	1
368	Q7L014|DDX46_HUMAN	Probable ATP-dependent RNA helicase DDX46 OS=Homo sapiens GN=DDX46 PE=1 SV=2	117 kDa	3	2	0
369	E9PK01|E9PK01_HUMAN (+3)	Elongation factor 1-delta (Fragment) OS=Homo sapiens GN=EEF1D PE=2 SV=1	29 kDa	3	1	0
370	Q9BSJ8-2|ESYT1_HUMAN (+1)	Isoform 2 of Extended synaptotagmin-1 OS=Homo sapiens GN=ESYT1	124 kDa	0	3	1
371	P20930|FILA_HUMAN	Filaggrin OS=Homo sapiens GN=FLG PE=1 SV=3	435 kDa	0	1	3
372	Q969S9-2|RRF2M_HUMAN (+2)	Isoform 2 of Ribosome-releasing factor 2, mitochondrial OS=Homo sapiens GN=GFM2	81 kDa	3	1	0
373	G3V180|G3V180_HUMAN (+3)	Dipeptidyl peptidase 3 OS=Homo sapiens GN=DPP3 PE=4 SV=1	84 kDa	1	3	0
374	Q14240-2|IF4A2_HUMAN (+1)	Isoform 2 of Eukaryotic initiation factor 4A-II OS=Homo sapiens GN=EIF4A2	46 kDa	11	9	0
375	P08240-2|SRPR_HUMAN (+1)	Isoform 2 of Signal recognition particle receptor subunit alpha OS=Homo sapiens GN=SRPR	67 kDa	1	3	0
376	E9PD53|E9PD53_HUMAN (+1)	Structural maintenance of chromosomes protein OS=Homo sapiens GN=SMC4 PE=2 SV=1	144 kDa	0	3	0
377	Q15054-2|DPOD3_HUMAN (+2)	Isoform 2 of DNA polymerase delta subunit 3 OS=Homo sapiens GN=POLD3	47 kDa	0	3	0
378	O95861-4|BPNT1_HUMAN (+1)	Isoform 4 of 3'(2'),5'-bisphosphate nucleotidase 1 OS=Homo sapiens GN=BPNT1	29 kDa	0	3	0
379	O00330-3|ODPX_HUMAN (+1)	Isoform 3 of Pyruvate dehydrogenase protein X component, mitochondrial OS=Homo sapiens GN=PDHX	51 kDa	3	0	0
380	O75306-2|NDUS2_HUMAN (+1)	Isoform 2 of NADH dehydrogenase [ubiquinone] iron-sulfur protein 2, mitochondrial OS=Homo sapiens GN=NDUFS2	52 kDa	4	0	0
381	P42166|LAP2A_HUMAN	Lamina-associated polypeptide 2, isoform alpha OS=Homo sapiens GN=TMPO PE=1 SV=2	75 kDa	0	4	0
382	P53618|COPB_HUMAN	Coatomer subunit beta OS=Homo sapiens GN=COPB1 PE=1 SV=3	107 kDa	0	4	0
383	Q15738|NSDHL_HUMAN	Sterol-4-alpha-carboxylate 3-dehydrogenase, decarboxylating OS=Homo sapiens GN=NSDHL PE=1 SV=2	42 kDa	0	4	0
384	P27694|RFA1_HUMAN	Replication protein A 70 kDa DNA-binding subunit OS=Homo sapiens GN=RPA1 PE=1 SV=2	68 kDa	4	0	0
385	Q9Y678|COPG1_HUMAN	Coatomer subunit gamma-1 OS=Homo sapiens GN=COPG1 PE=1 SV=1	98 kDa	0	4	0
386	O43252|PAPS1_HUMAN	Bifunctional 3'-phosphoadenosine 5'-phosphosulfate synthase 1 OS=Homo sapiens GN=PAPSS1 PE=1 SV=2	71 kDa	0	4	0
387	E7EPK1|E7EPK1_HUMAN (+3)	Septin-7 OS=Homo sapiens GN=SEPT7 PE=2 SV=1	51 kDa	0	4	0
388	B1AP13|B1AP13_HUMAN (+9)	Complement decay-accelerating factor OS=Homo sapiens GN=CD55 PE=2 SV=1	49 kDa	4	0	0
389	D3DQV9|D3DQV9_HUMAN (+1)	Eukaryotic translation initiation factor 4 gamma 2 (Fragment) OS=Homo sapiens GN=EIF4G2 PE=4 SV=1	102 kDa	4	0	0
390	E9PFR3|E9PFR3_HUMAN (+1)	Serine/threonine-protein phosphatase 2A 56 kDa regulatory subunit delta isoform OS=Homo sapiens GN=PPP2R5D PE=2 SV=1	69 kDa	0	4	0
391	B9A067|B9A067_HUMAN (+4)	Mitochondrial inner membrane protein OS=Homo sapiens GN=IMMT PE=2 SV=2	79 kDa	0	4	0
392	G3V1J5|G3V1J5_HUMAN (+2)	Exosome complex exonuclease RRP44 OS=Homo sapiens GN=DIS3 PE=4 SV=1	91 kDa	0	4	0
393	P30740|ILEU_HUMAN	Leukocyte elastase inhibitor OS=Homo sapiens GN=SERPINB1 PE=1 SV=1	43 kDa	0	4	0
394	O75533|SF3B1_HUMAN	Splicing factor 3B subunit 1 OS=Homo sapiens GN=SF3B1 PE=1 SV=3	146 kDa	0	4	0
395	O75521-2|ECI2_HUMAN (+1)	Isoform 2 of Enoyl-CoA delta isomerase 2, mitochondrial OS=Homo sapiens GN=ECI2	40 kDa	4	0	0
396	I7HJJ0|I7HJJ0_HUMAN (+2)	ADP/ATP translocase 3 (Fragment) OS=Homo sapiens GN=SLC25A6 PE=2 SV=1	17 kDa	2	1	0
397	P49006|MRP_HUMAN	MARCKS-related protein OS=Homo sapiens GN=MARCKSL1 PE=1 SV=2	20 kDa	2	1	0
398	B7Z738|B7Z738_HUMAN (+3)	Sec1 family domain-containing protein 1 OS=Homo sapiens GN=SCFD1 PE=2 SV=1	66 kDa	2	1	0
399	E9PAV3-2|NACAM_HUMAN (+1)	Isoform 2 of Nascent polypeptide-associated complex subunit alpha, muscle-specific form OS=Homo sapiens GN=NACA	95 kDa	2	1	0
400	E7ERG6|E7ERG6_HUMAN (+4)	B-cell receptor CD22 OS=Homo sapiens GN=CD22 PE=2 SV=1	74 kDa	1	2	0
401	E9PK25|E9PK25_HUMAN (+3)	Cofilin-1 OS=Homo sapiens GN=CFL1 PE=2 SV=1	23 kDa	1	2	0
402	P09874|PARP1_HUMAN	Poly [ADP-ribose] polymerase 1 OS=Homo sapiens GN=PARP1 PE=1 SV=4	113 kDa	1	2	0
403	O14828|SCAM3_HUMAN	Secretory carrier-associated membrane protein 3 OS=Homo sapiens GN=SCAMP3 PE=1 SV=3	38 kDa	1	2	0
404	H3BPS8|H3BPS8_HUMAN (+5)	Fructose-bisphosphate aldolase A (Fragment) OS=Homo sapiens GN=ALDOA PE=2 SV=1	30 kDa	1	2	0
405	P39748-2|FEN1_HUMAN (+1)	Isoform FENMIT of Flap endonuclease 1 OS=Homo sapiens GN=FEN1	36 kDa	2	1	0
406	P13995|MTDC_HUMAN (+1)	Bifunctional methylenetetrahydrofolate dehydrogenase/cyclohydrolase, mitochondrial OS=Homo sapiens GN=MTHFD2 PE=1 SV=2	38 kDa	1	2	0
407	B4E318|B4E318_HUMAN (+4)	BRCA2 and CDKN1A-interacting protein OS=Homo sapiens GN=BCCIP PE=2 SV=1	30 kDa	2	1	0
408	H7C3A1|H7C3A1_HUMAN (+5)	Serrate RNA effector molecule homolog (Fragment) OS=Homo sapiens GN=SRRT PE=2 SV=1	57 kDa	1	2	0
409	Q02252|MMSA_HUMAN (+1)	Methylmalonate-semialdehyde dehydrogenase [acylating], mitochondrial OS=Homo sapiens GN=ALDH6A1 PE=1 SV=2	58 kDa	2	1	0
410	P28907|CD38_HUMAN	ADP-ribosyl cyclase/cyclic ADP-ribose hydrolase 1 OS=Homo sapiens GN=CD38 PE=1 SV=2	34 kDa	1	2	0
411	C9JWN1|C9JWN1_HUMAN (+1)	Probable 2-oxoglutarate dehydrogenase E1 component DHKTD1, mitochondrial (Fragment) OS=Homo sapiens GN=DHTKD1 PE=2 SV=2	34 kDa	2	1	0
412	E7ERZ4|E7ERZ4_HUMAN (+2)	Mitochondrial-processing peptidase subunit beta OS=Homo sapiens GN=PMPCB PE=2 SV=1	45 kDa	1	2	0
413	E5RHT6|E5RHT6_HUMAN (+3)	ADP-ribosylation factor GTPase-activating protein 1 (Fragment) OS=Homo sapiens GN=ARFGAP1 PE=2 SV=2	27 kDa	1	2	0
414	Q9BS26|ERP44_HUMAN	Endoplasmic reticulum resident protein 44 OS=Homo sapiens GN=ERP44 PE=1 SV=1	47 kDa	1	2	0
415	G3V325|G3V325_HUMAN	Pentatricopeptide repeat-containing protein 1, mitochondrial OS=Homo sapiens GN=ATP5J2-PTCD1 PE=4 SV=1	84 kDa	2	1	0
416	P11172|UMPS_HUMAN	Uridine 5'-monophosphate synthase OS=Homo sapiens GN=UMPS PE=1 SV=1	52 kDa	2	1	0
417	Q99714-2|HCD2_HUMAN (+1)	Isoform 2 of 3-hydroxyacyl-CoA dehydrogenase type-2 OS=Homo sapiens GN=HSD17B10	26 kDa	1	2	0
418	Q92556|ELMO1_HUMAN	Engulfment and cell motility protein 1 OS=Homo sapiens GN=ELMO1 PE=1 SV=2	84 kDa	2	1	0
419	Q96IJ6-2|GMPPA_HUMAN (+1)	Isoform 2 of Mannose-1-phosphate guanyltransferase alpha OS=Homo sapiens GN=GMPPA	52 kDa	1	2	0
420	P16435|NCPR_HUMAN	NADPH--cytochrome P450 reductase OS=Homo sapiens GN=POR PE=1 SV=2	77 kDa	1	2	0
421	Q12874|SF3A3_HUMAN	Splicing factor 3A subunit 3 OS=Homo sapiens GN=SF3A3 PE=1 SV=1	59 kDa	2	1	0
422	B7Z5F6|B7Z5F6_HUMAN (+3)	NEDD8-activating enzyme E1 catalytic subunit OS=Homo sapiens GN=UBA3 PE=2 SV=1	32 kDa	2	0	1
423	P18031|PTN1_HUMAN	Tyrosine-protein phosphatase non-receptor type 1 OS=Homo sapiens GN=PTPN1 PE=1 SV=1	50 kDa	2	1	0
424	F5GZJ1|F5GZJ1_HUMAN (+1)	Condensin complex subunit 1 OS=Homo sapiens GN=NCAPD2 PE=2 SV=1	152 kDa	0	2	1
425	Q9HDC9-2|APMAP_HUMAN (+1)	Isoform 2 of Adipocyte plasma membrane-associated protein OS=Homo sapiens GN=APMAP	32 kDa	2	1	0
426	E7EMM2|E7EMM2_HUMAN (+6)	AP-3 complex subunit delta-1 OS=Homo sapiens GN=AP3D1 PE=2 SV=1	111 kDa	2	0	1
427	H0Y449|H0Y449_HUMAN (+1)	Nuclease-sensitive element-binding protein 1 (Fragment) OS=Homo sapiens GN=YBX1 PE=4 SV=1	42 kDa	1	2	0
428	Q9Y295|DRG1_HUMAN	Developmentally-regulated GTP-binding protein 1 OS=Homo sapiens GN=DRG1 PE=1 SV=1	41 kDa	1	2	0
429	P51570|GALK1_HUMAN (+1)	Galactokinase OS=Homo sapiens GN=GALK1 PE=1 SV=1	42 kDa	0	2	1
430	P53621-2|COPA_HUMAN (+1)	Isoform 2 of Coatomer subunit alpha OS=Homo sapiens GN=COPA	139 kDa	1	2	0
431	Q9P258|RCC2_HUMAN	Protein RCC2 OS=Homo sapiens GN=RCC2 PE=1 SV=2	56 kDa	0	2	0
432	E7EUM5|E7EUM5_HUMAN (+2)	Nucleoporin p54 OS=Homo sapiens GN=NUP54 PE=2 SV=2	37 kDa	2	0	0
433	C9JXC1|C9JXC1_HUMAN (+2)	Ribonucleoside-diphosphate reductase subunit M2 (Fragment) OS=Homo sapiens GN=RRM2 PE=2 SV=1	34 kDa	0	2	0
434	Q13347|EIF3I_HUMAN	Eukaryotic translation initiation factor 3 subunit I OS=Homo sapiens GN=EIF3I PE=1 SV=1	37 kDa	3	0	0
435	Q13148|TADBP_HUMAN	TAR DNA-binding protein 43 OS=Homo sapiens GN=TARDBP PE=1 SV=1	45 kDa	3	0	0
436	E9PC52|E9PC52_HUMAN (+6)	Histone-binding protein RBBP7 OS=Homo sapiens GN=RBBP7 PE=2 SV=1	47 kDa	3	0	0
437	Q9H845|ACAD9_HUMAN	Acyl-CoA dehydrogenase family member 9, mitochondrial OS=Homo sapiens GN=ACAD9 PE=1 SV=1	69 kDa	0	3	0
438	Q15181|IPYR_HUMAN	Inorganic pyrophosphatase OS=Homo sapiens GN=PPA1 PE=1 SV=2	33 kDa	3	0	0
439	P43007|SATT_HUMAN	Neutral amino acid transporter A OS=Homo sapiens GN=SLC1A4 PE=1 SV=1	56 kDa	0	3	0
440	Q99805|TM9S2_HUMAN	Transmembrane 9 superfamily member 2 OS=Homo sapiens GN=TM9SF2 PE=1 SV=1	76 kDa	0	3	0
441	F5GXC8|F5GXC8_HUMAN (+2)	Succinyl-CoA ligase [ADP-forming] subunit beta, mitochondrial OS=Homo sapiens GN=SUCLA2 PE=3 SV=1	44 kDa	0	3	0
442	O15143|ARC1B_HUMAN	Actin-related protein 2/3 complex subunit 1B OS=Homo sapiens GN=ARPC1B PE=1 SV=3	41 kDa	0	3	0
443	Q03518|TAP1_HUMAN	Antigen peptide transporter 1 OS=Homo sapiens GN=TAP1 PE=1 SV=2	87 kDa	0	3	0
444	P39023|RL3_HUMAN	60S ribosomal protein L3 OS=Homo sapiens GN=RPL3 PE=1 SV=2	46 kDa	0	3	0
445	O43681|ASNA_HUMAN	ATPase ASNA1 OS=Homo sapiens GN=ASNA1 PE=1 SV=2	39 kDa	3	0	0
446	F8W0V3|F8W0V3_HUMAN (+1)	Extracellular glycoprotein lacritin OS=Homo sapiens GN=LACRT PE=2 SV=1	13 kDa	0	3	0
447	O60256-3|KPRB_HUMAN (+1)	Isoform 3 of Phosphoribosyl pyrophosphate synthase-associated protein 2 OS=Homo sapiens GN=PRPSAP2	36 kDa	3	0	0
448	Q02790|FKBP4_HUMAN	Peptidyl-prolyl cis-trans isomerase FKBP4 OS=Homo sapiens GN=FKBP4 PE=1 SV=3	52 kDa	3	0	0
449	H0YAV1|H0YAV1_HUMAN (+1)	Ribonucleoside-diphosphate reductase subunit M2 B (Fragment) OS=Homo sapiens GN=RRM2B PE=4 SV=1	47 kDa	0	3	0
450	Q16134|ETFD_HUMAN (+1)	Electron transfer flavoprotein-ubiquinone oxidoreductase, mitochondrial OS=Homo sapiens GN=ETFDH PE=1 SV=2	68 kDa	3	0	0
451	P30490|1B52_HUMAN	HLA class I histocompatibility antigen, B-52 alpha chain OS=Homo sapiens GN=HLA-B PE=1 SV=1	41 kDa	0	4	0
452	Q99460-2|PSMD1_HUMAN (+1)	Isoform 2 of 26S proteasome non-ATPase regulatory subunit 1 OS=Homo sapiens GN=PSMD1	102 kDa	3	0	0
453	J3KN66|J3KN66_HUMAN (+1)	Torsin-1A-interacting protein 1 OS=Homo sapiens GN=TOR1AIP1 PE=2 SV=1	68 kDa	0	3	0
454	P05198|IF2A_HUMAN	Eukaryotic translation initiation factor 2 subunit 1 OS=Homo sapiens GN=EIF2S1 PE=1 SV=3	36 kDa	3	0	0
455	Q9NV96-2|CC50A_HUMAN (+2)	Isoform 2 of Cell cycle control protein 50A OS=Homo sapiens GN=TMEM30A	37 kDa	3	0	0
456	O15069|NACAD_HUMAN	NAC-alpha domain-containing protein 1 OS=Homo sapiens GN=NACAD PE=1 SV=3	161 kDa	3	0	0
457	Q9Y4W6|AFG32_HUMAN	AFG3-like protein 2 OS=Homo sapiens GN=AFG3L2 PE=1 SV=2	89 kDa	3	0	0
458	B4DV00|B4DV00_HUMAN (+7)	Protein arginine N-methyltransferase 5 OS=Homo sapiens GN=PRMT5 PE=2 SV=1	61 kDa	0	2	0
459	C9JEH3|C9JEH3_HUMAN (+2)	Angio-associated migratory cell protein OS=Homo sapiens GN=AAMP PE=4 SV=1	47 kDa	2	0	0
460	P15391|CD19_HUMAN	B-lymphocyte antigen CD19 OS=Homo sapiens GN=CD19 PE=1 SV=6	61 kDa	0	2	0
461	P26842|CD27_HUMAN	CD27 antigen OS=Homo sapiens GN=CD27 PE=1 SV=2	29 kDa	0	2	0
462	B4E3S0|B4E3S0_HUMAN (+4)	Coronin OS=Homo sapiens GN=CORO1C PE=2 SV=1	42 kDa	0	2	0
463	Q9Y385|UB2J1_HUMAN	Ubiquitin-conjugating enzyme E2 J1 OS=Homo sapiens GN=UBE2J1 PE=1 SV=2	35 kDa	2	0	0
464	Q32MZ4-2|LRRF1_HUMAN (+2)	Isoform 2 of Leucine-rich repeat flightless-interacting protein 1 OS=Homo sapiens GN=LRRFIP1	86 kDa	2	0	0
465	Q8N0W4-2|NLGNX_HUMAN (+1)	Isoform 2 of Neuroligin-4, X-linked OS=Homo sapiens GN=NLGN4X	94 kDa	0	2	0
466	B3KQV7|B3KQV7_HUMAN (+1)	Equilibrative nucleoside transporter 1 OS=Homo sapiens GN=SLC29A1 PE=2 SV=1	59 kDa	2	0	0
467	A8MUM1|A8MUM1_HUMAN (+4)	Protein TSSC1 OS=Homo sapiens GN=TSSC1 PE=2 SV=2	46 kDa	2	0	0
468	P21281|VATB2_HUMAN	V-type proton ATPase subunit B, brain isoform OS=Homo sapiens GN=ATP6V1B2 PE=1 SV=3	57 kDa	2	0	0
469	P11166|GTR1_HUMAN	Solute carrier family 2, facilitated glucose transporter member 1 OS=Homo sapiens GN=SLC2A1 PE=1 SV=2	54 kDa	0	2	0
470	O76003|GLRX3_HUMAN	Glutaredoxin-3 OS=Homo sapiens GN=GLRX3 PE=1 SV=2	37 kDa	2	0	0
471	Q96CS3|FAF2_HUMAN	FAS-associated factor 2 OS=Homo sapiens GN=FAF2 PE=1 SV=2	53 kDa	2	0	0
472	B4DNJ6|B4DNJ6_HUMAN (+1)	Serine-threonine kinase receptor-associated protein OS=Homo sapiens GN=STRAP PE=2 SV=1	40 kDa	2	0	0
473	O00487|PSDE_HUMAN	26S proteasome non-ATPase regulatory subunit 14 OS=Homo sapiens GN=PSMD14 PE=1 SV=1	35 kDa	0	2	0
474	E7ETZ4|E7ETZ4_HUMAN (+1)	Basic leucine zipper and W2 domain-containing protein 2 (Fragment) OS=Homo sapiens GN=BZW2 PE=2 SV=1	47 kDa	0	3	0
475	Q9H223|EHD4_HUMAN	EH domain-containing protein 4 OS=Homo sapiens GN=EHD4 PE=1 SV=1	61 kDa	0	4	0
476	Q13492-2|PICAL_HUMAN (+3)	Isoform 2 of Phosphatidylinositol-binding clathrin assembly protein OS=Homo sapiens GN=PICALM	69 kDa	2	0	0
477	E9PQD7|E9PQD7_HUMAN (+2)	40S ribosomal protein S2 OS=Homo sapiens GN=RPS2 PE=4 SV=1	25 kDa	0	2	0
478	O95671-2|ASML_HUMAN (+1)	Isoform 2 of N-acetylserotonin O-methyltransferase-like protein OS=Homo sapiens GN=ASMTL	67 kDa	2	0	0
479	H0YDU8|H0YDU8_HUMAN (+1)	Serine/threonine-protein phosphatase (Fragment) OS=Homo sapiens GN=PPP5C PE=3 SV=1	55 kDa	0	2	0
480	P49748-2|ACADV_HUMAN (+2)	Isoform 2 of Very long-chain specific acyl-CoA dehydrogenase, mitochondrial OS=Homo sapiens GN=ACADVL	68 kDa	2	0	0
481	H0Y2W2|H0Y2W2_HUMAN (+3)	ATPase family AAA domain-containing protein 3A (Fragment) OS=Homo sapiens GN=ATAD3A PE=4 SV=1	64 kDa	0	2	0
482	P26440|IVD_HUMAN	Isovaleryl-CoA dehydrogenase, mitochondrial OS=Homo sapiens GN=IVD PE=1 SV=1	46 kDa	2	0	0
483	F5H5A9|F5H5A9_HUMAN (+2)	Suppressor of G2 allele of SKP1 homolog OS=Homo sapiens GN=SUGT1 PE=2 SV=1	32 kDa	2	0	0
484	P32019-3|I5P2_HUMAN	Isoform 3 of Type II inositol 1,4,5-trisphosphate 5-phosphatase OS=Homo sapiens GN=INPP5B	86 kDa	0	2	0
485	O43852-2|CALU_HUMAN (+5)	Isoform 2 of Calumenin OS=Homo sapiens GN=CALU	37 kDa	2	0	0
486	Q16563-2|SYPL1_HUMAN (+1)	Isoform 2 of Synaptophysin-like protein 1 OS=Homo sapiens GN=SYPL1	26 kDa	0	2	0
487	E7ES43|E7ES43_HUMAN (+2)	Heat shock 70 kDa protein 4L OS=Homo sapiens GN=HSPA4L PE=2 SV=2	98 kDa	0	3	0
488	P11908-2|PRPS2_HUMAN (+1)	Isoform 2 of Ribose-phosphate pyrophosphokinase 2 OS=Homo sapiens GN=PRPS2	35 kDa	0	2	0
489	P11388-2|TOP2A_HUMAN (+3)	Isoform 2 of DNA topoisomerase 2-alpha OS=Homo sapiens GN=TOP2A	178 kDa	0	2	0
490	Q14204|DYHC1_HUMAN	Cytoplasmic dynein 1 heavy chain 1 OS=Homo sapiens GN=DYNC1H1 PE=1 SV=5	532 kDa	0	2	0
491	Q8TCZ2-2|C99L2_HUMAN (+3)	Isoform 2 of CD99 antigen-like protein 2 OS=Homo sapiens GN=CD99L2	23 kDa	2	0	0
492	G5E9Z2|G5E9Z2_HUMAN (+2)	Cisplatin resistance related protein CRR9p, isoform CRA_c OS=Homo sapiens GN=CLPTM1L PE=4 SV=1	43 kDa	0	2	0
493	M0QZR4|M0QZR4_HUMAN (+3)	Rho guanine nucleotide exchange factor 1 OS=Homo sapiens GN=ARHGEF1 PE=2 SV=1	108 kDa	0	2	0
494	O95573|ACSL3_HUMAN	Long-chain-fatty-acid--CoA ligase 3 OS=Homo sapiens GN=ACSL3 PE=1 SV=3	80 kDa	0	2	0
495	P01903|DRA_HUMAN (+1)	HLA class II histocompatibility antigen, DR alpha chain OS=Homo sapiens GN=HLA-DRA PE=1 SV=1	29 kDa	2	0	0
496	K7EM16|K7EM16_HUMAN (+1)	Vasodilator-stimulated phosphoprotein (Fragment) OS=Homo sapiens GN=VASP PE=4 SV=1	20 kDa	0	2	0
497	P46777|RL5_HUMAN	60S ribosomal protein L5 OS=Homo sapiens GN=RPL5 PE=1 SV=3	34 kDa	0	2	0
498	Q9Y6G9|DC1L1_HUMAN	Cytoplasmic dynein 1 light intermediate chain 1 OS=Homo sapiens GN=DYNC1LI1 PE=1 SV=3	57 kDa	2	0	0
499	D6RAX7|D6RAX7_HUMAN (+3)	COP9 signalosome complex subunit 4 OS=Homo sapiens GN=COPS4 PE=2 SV=1	48 kDa	2	0	0
500	Q9H1E3|NUCKS_HUMAN	Nuclear ubiquitous casein and cyclin-dependent kinase substrate 1 OS=Homo sapiens GN=NUCKS1 PE=1 SV=1	27 kDa	0	0	2
501	Q969P0-3|IGSF8_HUMAN (+1)	Isoform 3 of Immunoglobulin superfamily member 8 OS=Homo sapiens GN=IGSF8	56 kDa	0	2	0
502	B7Z341|B7Z341_HUMAN (+4)	Protein NDRG3 OS=Homo sapiens GN=NDRG3 PE=2 SV=1	30 kDa	2	0	0
503	O60942-2|MCE1_HUMAN (+4)	Isoform 2 of mRNA-capping enzyme OS=Homo sapiens GN=RNGTT	66 kDa	2	0	0
504	P09429|HMGB1_HUMAN	High mobility group protein B1 OS=Homo sapiens GN=HMGB1 PE=1 SV=3	25 kDa	0	0	2
505	B7ZKM0|B7ZKM0_HUMAN (+2)	SART3 protein OS=Homo sapiens GN=SART3 PE=2 SV=1	106 kDa	0	2	0
506	C9JXK0|C9JXK0_HUMAN (+1)	Lamin-B receptor (Fragment) OS=Homo sapiens GN=LBR PE=2 SV=1	24 kDa	0	2	0
507	F5H362|F5H362_HUMAN (+4)	Acyl-CoA synthetase family member 3, mitochondrial (Fragment) OS=Homo sapiens GN=ACSF3 PE=2 SV=1	22 kDa	0	2	0
508	Q02750|MP2K1_HUMAN	Dual specificity mitogen-activated protein kinase kinase 1 OS=Homo sapiens GN=MAP2K1 PE=1 SV=2	43 kDa	0	2	0
END OF FILE

## Sheet: Addtl exp information
080814ENGiovannoneID, Samples report created on 08/11/2014
Experiment: 080814ENGiovannoneID
	Peak List Generator: unknown
		Version: unknown
		Charge States Calculated: unknown
		Deisotoped: unknown
		Textual Annotation: unknown
	Database Set: 1 Database
		Database Name: the HUMAN_20140709 database
			Version: unknown
			Taxonomy: All Entries
			Number of Proteins: 88993
		Does database contain common contaminants?: unknown
	Search Engine Set: 1 Search Engine
		Search Engine: Mascot
			Version: 2.5.0
			Samples: All Samples
			Fragment Tolerance: 0.80 Da (Monoisotopic)
			Parent Tolerance: 18 PPM (Monoisotopic)
			Fixed Modifications: +18 on O (O+18), +57 on C (Carbamidomethyl)
			Variable Modifications: +1 on NQ (Deamidated), +16 on M (Oxidation)
			Database: the HUMAN_20140709 database (unknown version, 88993 entries)
			Digestion Enzyme: Trypsin
			Max Missed Cleavages: 2
			Probability Model:
				080714ENGblank (F003486): LFDR Model, Classifier data: Bayes, Good (50%) m:64.7/s:17.2 m:34.9/s:2.83 m:NA m:45.1/s:24.4, Bad (50%) m:17.4/s:5.76 m:32.2/s:4.02 m:NA m:5.50/s:4.09 [all charge states]
				080714ENGRajiBCell (F003485): LFDR Model, Classifier data: Bayes, Good (50%) m:65.9/s:17.4 m:35.4/s:2.60 m:NA m:42.4/s:26.0, Bad (50%) m:13.4/s:6.51 m:32.8/s:3.87 m:NA m:3.80/s:3.68 [all charge states]
				080714ENGRamosBCell (F003484): LFDR Model, Classifier data: Bayes, Good (50%) m:64.1/s:16.0 m:35.2/s:2.86 m:NA m:40.5/s:25.5, Bad (50%) m:12.4/s:6.51 m:32.9/s:3.85 m:NA m:3.60/s:3.73 [all charge states]
	Scaffold: Version: Scaffold_4.3.4
		Modification Metadata Set: 1541 modifications
			Source: C:\Program Files\Scaffold 4\parameters\unimod.xml
			Comment:
		Protein Grouping Strategy: Experiment-wide grouping with binary peptide-protein weights
		Peptide Thresholds: 6.0% minimum
		Protein Thresholds: 96.0% minimum and 2 peptides minimum
		Peptide FDR: 1.5% (Decoy)
		Protein FDR: 1.9% (Decoy)
		GO Annotation Source(s):
