# Supplementary material for: Human B Cell Differentiation Is Characterized by Progressive Remodeling of O-Linked Glycans
Source: Front Immunol. 2018 Dec 14;9:2857. doi: 10.3389/fimmu.2018.02857 (PMC6302748; doi:10.3389/fimmu.2018.02857)
Supplement: Supplementary file 2 [file Image_1.pdf]

## *Supplementary Material*

### **Human B cell differentiation is characterized by progressive remodeling of O-linked glycans**

**Nicholas Giovannone, Aristotelis Antonopoulos, Jennifer Liang, Jenna Geddes Sweeney, Matthew R. Kudelka, Sandra L. King, Gi Soo Lee, Richard D. Cummings, Anne Dell, Steven R. Barthel, Hans R. Widlund, Stuart M. Haslam, and Charles J. Dimitroff\***

\* Correspondence: Charles J. Dimitroff, [cdimitroff@bwh.harvard.edu](mailto:cdimitroff@bwh.harvard.edu)

## 1.1 Supplementary Figures

Supplementary Figure 1

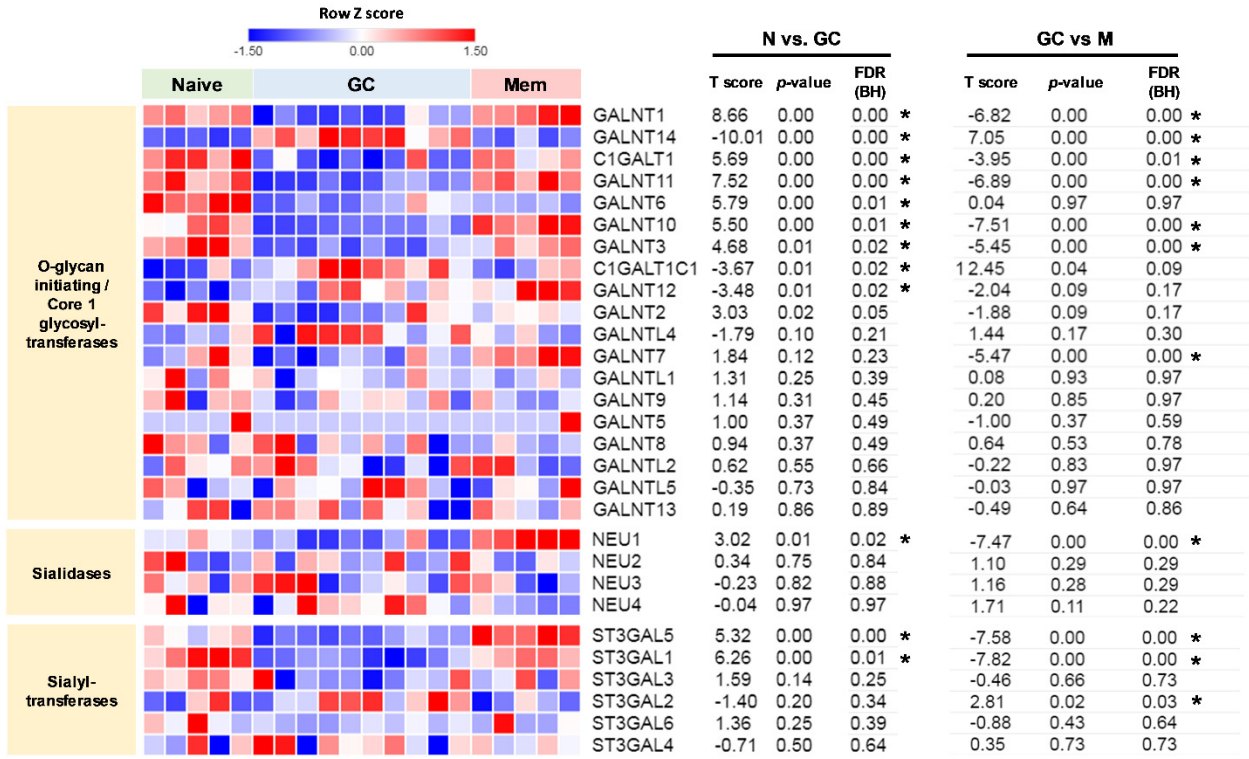

**Supplementary Fig. 1:** Analysis of O-glycosylation enzyme expression in tonsillar B cells. Publicly available datasets (GSE12195) were analyzed for expression of O-glycan initiating enzymes (*GALNTs*), Core 1 synthase (*C1GALT1*), C1GalT1 chaperone (*C1GALT1C1*), sialidases (*NEUs*), and  $\alpha$ 2,3-sialyltransferases (*ST3GALs*) in human B cell subsets. Each column represents a unique tonsil specimen. Statistics were performed for each row by individual two-tailed, unpaired Student's *t*-test and corrected for multiple comparisons using Benjamini-Hochberg False Discovery procedure. FDR  $q < 0.05$  (\*) was considered statistically significant.

Supplementary Fig. 2

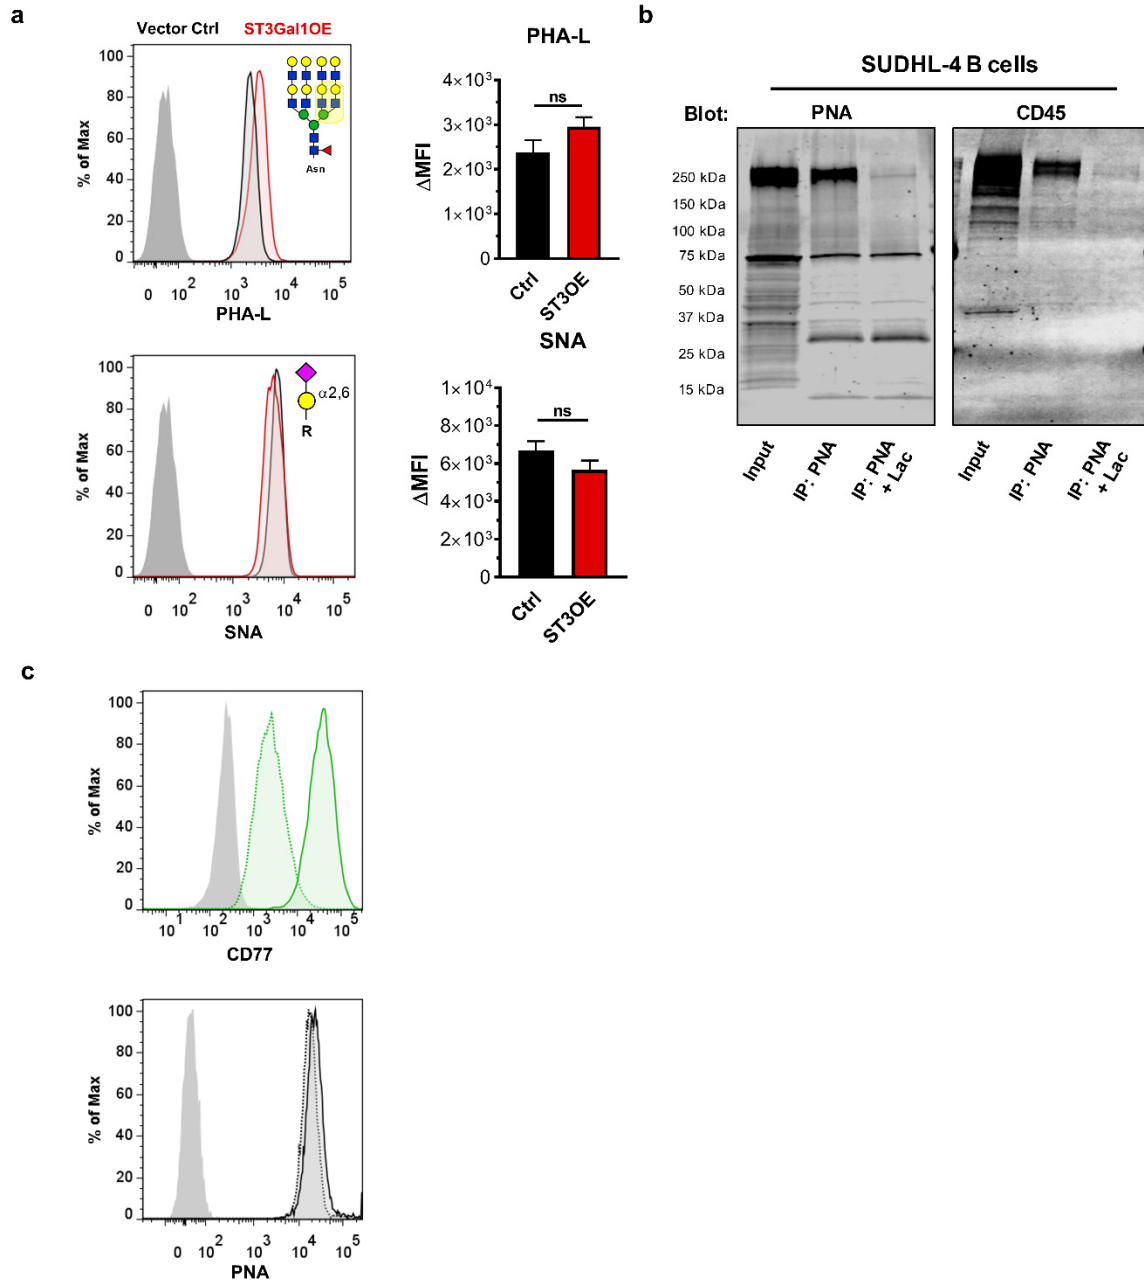

**Supplementary Fig. 2: PNA ligands are expressed as O-glycans on CD45 and are not meaningfully expressed on glycolipids of Ramos B cells.** (a) Representative histogram (*left*) and quantification (*right*) of PHA-L (tri- and tetra-antennary N-glycans) and SNA ( $\alpha$ 2,6-sialic acid) plant lectin binding to vector control and ST3Gal10E Ramos B cells. (b) Immunoprecipitation (IP) of PNA-binding proteins from lysates of the GC-derived diffuse large B cell lymphoma (DLBCL) lymphoma cell line SUDHL-4, followed by SDS-PAGE and immunoblot with either PNA (*left*) or total CD45 antibody (*right*). As a negative control for carbohydrate binding, IP was also performed in the presence of a sugar inhibitor, lactose (Lac; right lane). (c) Representative histograms depicting CD77 (Gb3 glycolipid) expression and PNA binding by Ramos B cells without (solid line) or with (dotted line) 72hr treatment with D,L-threo-1-phenyl-2-hexadecanoylamino-3-pyrrolidino-1-propanol-HCl (PPPP), a Glc-Cer synthase (UGCG) inhibitor that blocks glycolipid synthesis.

Supplementary Fig. 3

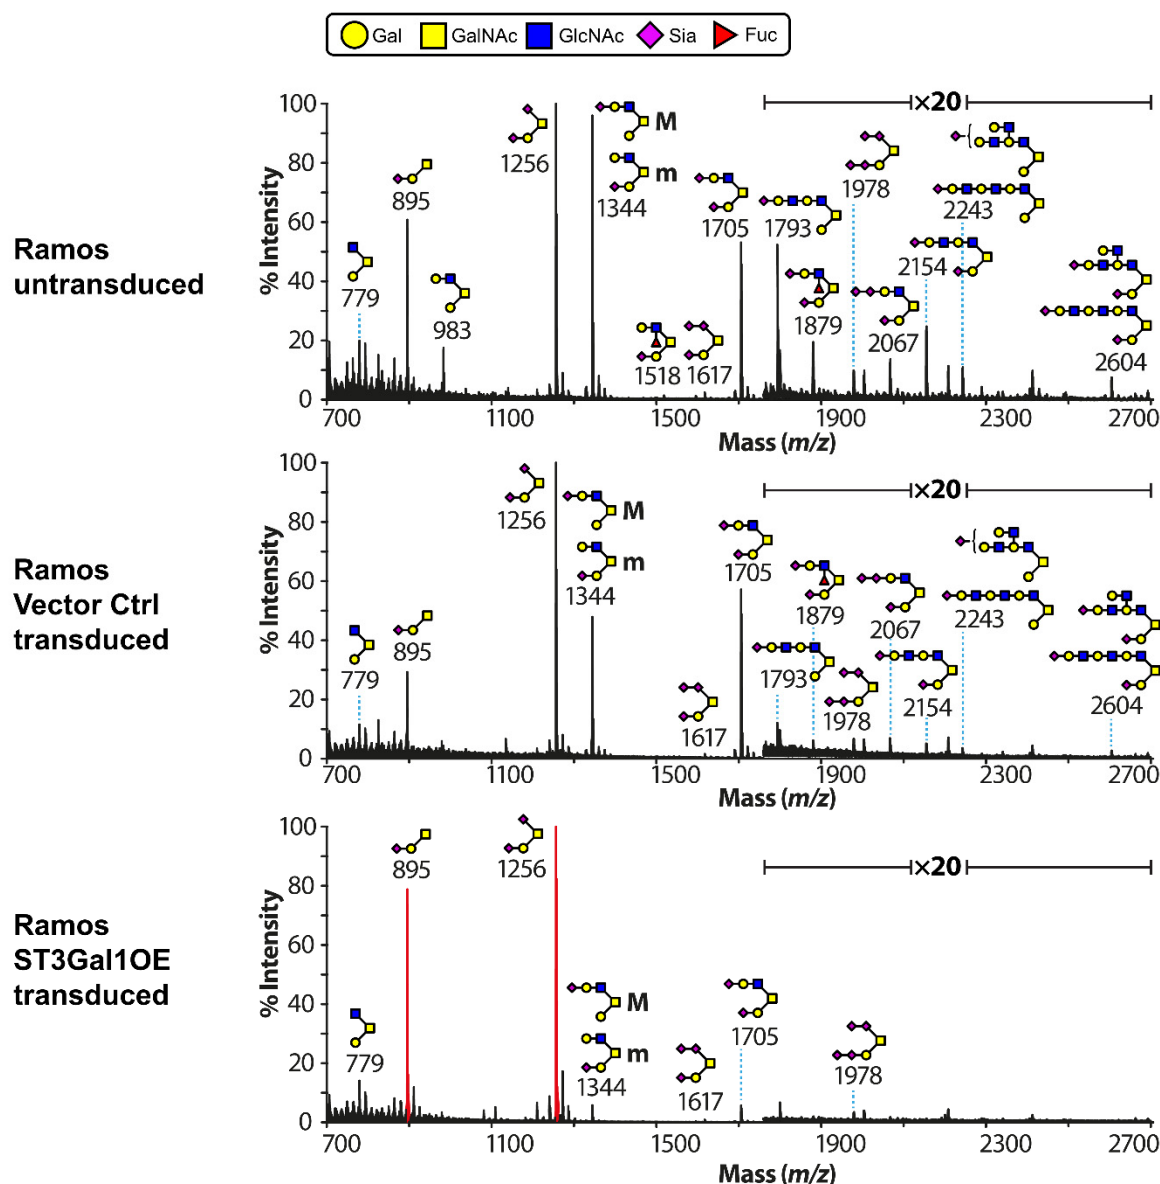

**Supplementary Figure 3: O-glycomic analysis of ST3Gal1 variant Ramos B cells.** Conventional MALDI-TOF MS analysis of O-glycans from untreated, vector control and ST3Gal1OE Ramos B cells. Structures above a bracket have not been unequivocally defined. Indicated areas in the spectra have a 20-fold magnification. “M” and “m” designations indicate major and minor abundances, respectively. Cartoon structures were drawn according to <http://www.functionalglycomics.org> guidelines and are representative from repeat experiments on two different biological replicates. Structure assignments are based on composition, tandem mass spectrometry and biosynthetic knowledge. Fuc, fucose; Man, mannose; Gal, galactose; GlcNAc, N-acetylglucosamine; GalNAc, N-acetylgalactosamine; Sia, N-acetylneuraminic acid (sialic acid). Full methods can be found in Materials and Methods.

Supplementary Fig. 4

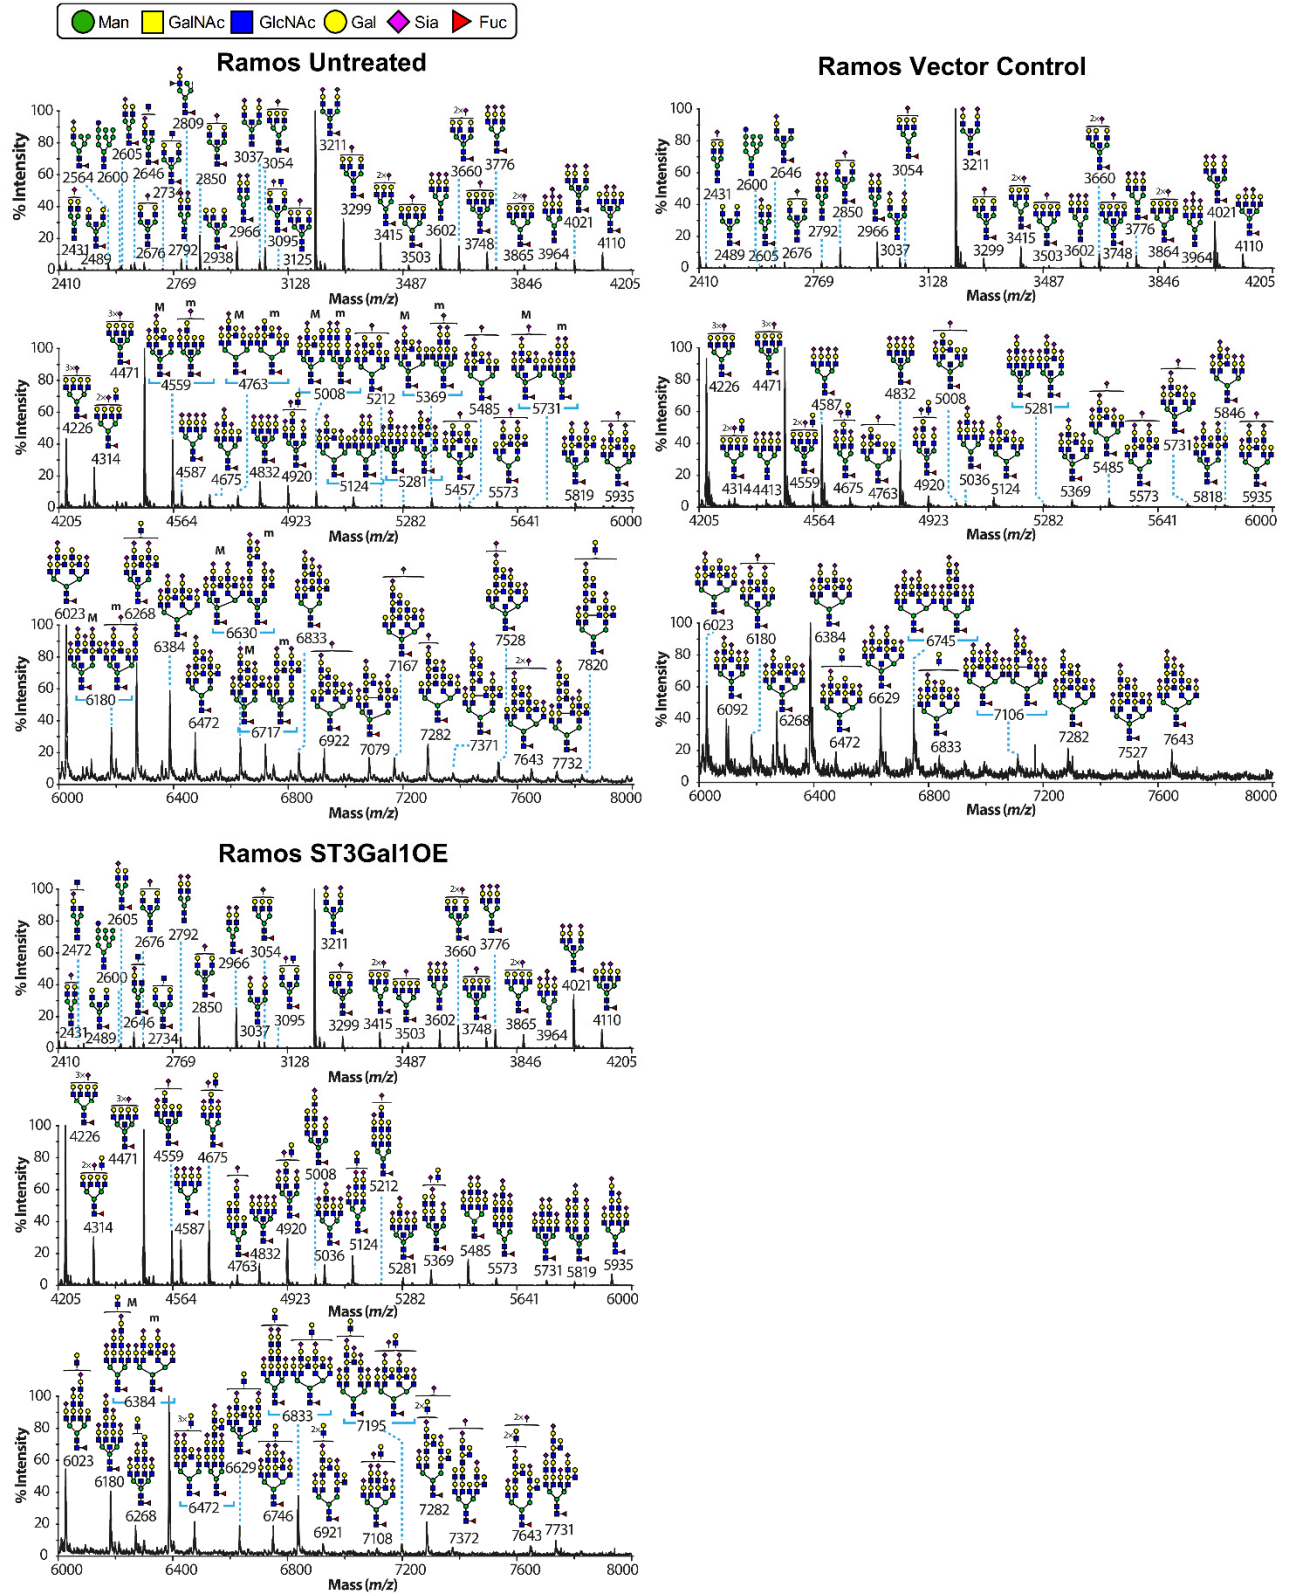

**Supplementary Fig. 4: N-glycomic analysis of ST3Gal1 variant Ramos B cells.** MALDI-TOF MS analysis of permethylated N-glycans released by PNGase F digestion of untreated, vector control and ST3Gal1OE Ramos B cells. Structures above a bracket have not been unequivocally defined. “M” and “m” designations indicate major and minor abundances, respectively. Cartoon structures were drawn according to <http://www.functionalglycomics.org> guidelines and are representative from repeat experiments on two different biological replicates. Structure assignments are based on composition, tandem mass spectrometry and biosynthetic knowledge. Fuc, fucose; Man, mannose; Gal, galactose; GlcNAc, N-acetylglucosamine; Sia, N-acetylneuraminic acid (sialic acid). Full methods can be found in Materials and Methods.

Supplementary Fig. 5

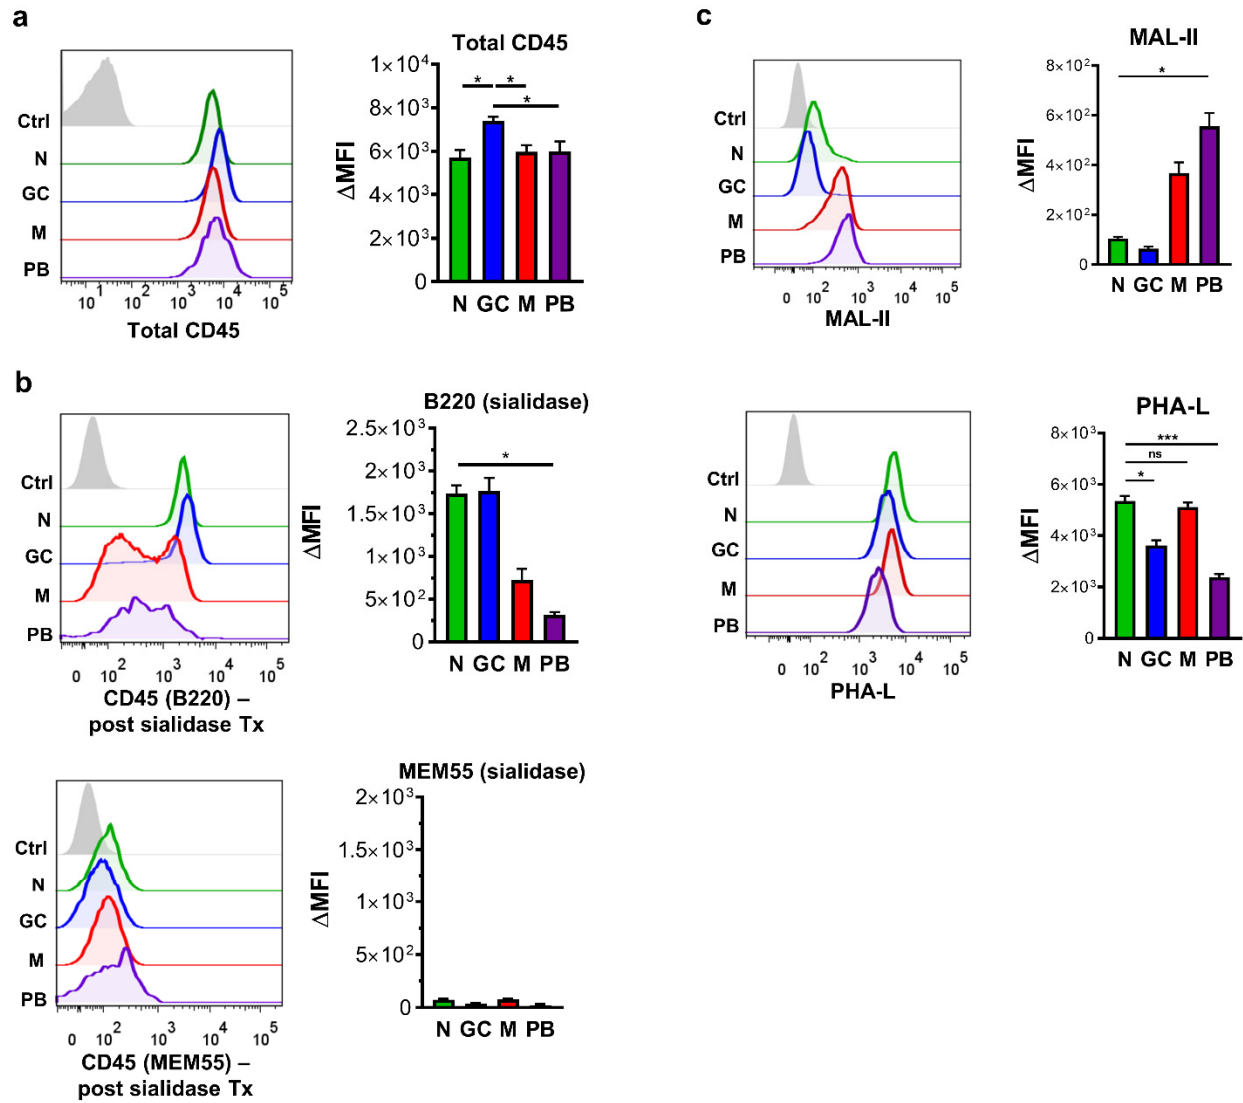

**Supplementary Fig. 5: Analysis of CD45 glycoform and global glycosylation of primary B cells by CD45 mAb and plant-lectin based flow cytometry.** (a) Representative histograms (*left*) and quantification (*right*) of total CD45 expression (HI30 clone) on tonsillar B cell subsets. (b) Representative histograms (*left*) and quantification (*right*) of binding of CD45 mAbs B220 and MEM55 to the indicated tonsillar B cell subsets following treatment with *Arthrobacter ureafaciens* sialidase. (c) Representative histograms (*left*) and quantification (*right*) of binding of MAL-II (sialylated T-antigen) and PHA-L plant lectins (tri- and tetra-antennary complex N-glycan binding preference) to primary tonsillar B cells by flow cytometry, gated as in Fig. 1a. See also Fig. 7a for schematic depicting glycan-binding preferences of MAL-II and PHA-L. For (a) and (b), n=5 distinct tonsil specimens. For (c), n=8 (MAL-II) or n=9 (PHA-L) distinct tonsil specimens. Statistics in (a-c) were calculated using a Kruskal-Wallis test with Dunn's multiple comparisons test. Throughout, bars and error bars depict the mean and SEM, respectively. ns = not significant, \*p≤0.05, \*\*\*p≤0.001. ΔMFI, background subtracted geometric mean fluorescence intensity.

**Supplementary Table 1: Oligonucleotide sequences**

| Target                          | Application        | Forward (5'→3')                           | Reverse (5'→3')                          |
|---------------------------------|--------------------|-------------------------------------------|------------------------------------------|
| Hu <i>ST3GAL1</i>               | cDNA Amplification | cgacgaattcgccaccatggtgaccctgcggaa<br>gagg | ccgggatcctcatctccccttgaagatccg<br>gatttt |
| Hu <i>ST3GAL1</i>               | qRT-PCR<br>(60°C)  | gcatttctctttccacagc                       | ctaattcccagccacctca                      |
| Hu <i>GCNT1</i>                 | qRT-PCR<br>(60°C)  | aatttccgatgcccatgat                       | agggccaaagtccttcaa                       |
| Hu <i>VCP</i><br>(housekeeping) | qRT-PCR<br>(60°C)  | aggatgatccagtcctgag                       | ggaatctgaagctgccaag                      |

**Supplementary Table 2: Antibodies and reagents**

| Lectins and glycobiology reagents                                          |                |       |                                                 |                |                          |                 |
|----------------------------------------------------------------------------|----------------|-------|-------------------------------------------------|----------------|--------------------------|-----------------|
| Target                                                                     | Conjugate      | Clone | Source                                          | Catalog number | Concentration / Dilution | Incubation time |
| <i>Arachis hypogea</i> (PNA)                                               | FITC           | -     | Sigma                                           | L7381          | 10µg/mL (FACS)           | 45min, ice      |
| Jacalin lectin                                                             | FITC           | -     | Vector                                          | FL-1151        | 5µg/mL (FACS)            | 45min, ice      |
| <i>Phaseolus vulgaris</i> Leucoagglutinin (PHA-L)                          | FITC           | -     | Vector                                          | FL-1111        | 2µg/mL (FACS)            | 45min, ice      |
| <i>Solanum Tuberosum</i> Agglutinin (STA)                                  | FITC           | -     | Vector                                          | FL-1161        | 2µg/mL (FACS)            | 45min, ice      |
| <i>Helix pomatia</i> agglutinin                                            | AlexaFluor 488 | -     | Life Technologies                               | L11271         | 5µg/mL (FACS)            | 45min, ice      |
| <i>Arachis hypogea</i> (PNA)                                               | Biotin         | -     | Vector                                          | L6135          | 2µg/mL (FACS)            | 45min, ice      |
| <i>Sambucus Nigra</i> Agglutinin (SNA)                                     | Biotin         | -     | Vector                                          | FL-1301        | 2µg/mL (FACS)            | 45min, ice      |
| <i>Maackia Amurensis</i> Lectin II (MAL-II)                                | Biotin         | -     | Vector                                          | B-1265         | 0.5µg/mL (FACS)          | 45min, ice      |
| <i>Phaseolus vulgaris</i> Leucoagglutinin (PHA-L)                          | Biotin         | -     | Vector                                          | B-1115         | 0.1µg/mL (FACS)          | 45min, ice      |
| <i>Solanum Tuberosum</i> Agglutinin (STA)                                  | Biotin         | -     | Vector                                          | B-1165         | 0.1µg/mL (FACS)          | 45min, ice      |
| <i>Sambucus Nigra</i> Agglutinin (SNA)                                     | Biotin         | -     | Vector                                          | B-1305         | 0.25µg/mL (FACS)         | 45min, ice      |
| <i>Arthrobacter ureafaciens</i> sialidase                                  | -              | -     | Millipore-Sigma                                 | 10269611001    | 125mU / mL               | 1hr, RT         |
| D-1-threo-1-phenyl-2-hexadecanoylamino-3-pyrrolidino-1-propanol-HCl (PPPP) | -              | -     | Gift from Dr. Ronald L. Schnaar (Johns Hopkins) | -              | 2µM                      | 72hr incubation |

| Flow cytometry antibodies and staining reagents |              |            |           |                |                          |                      |
|-------------------------------------------------|--------------|------------|-----------|----------------|--------------------------|----------------------|
| Target                                          | Conjugate    | Clone      | Source    | Catalog number | Concentration / Dilution | Incubation time      |
| CD3                                             | APC-Cy7      | HIT3a      | Biolegend | 300318         | 1:100 (FACS)             | 45min, ice           |
| CD14                                            | APC-Cy7      | HCD14      | Biolegend | 325620         | 1:160 (FACS)             | 45min, ice           |
| CD19                                            | PerCP        | HIB19      | Biolegend | 302228         | 1:40 (FACS)              | 45min, ice           |
| CD19                                            | APC          | HIB19      | Biolegend | 302212         | 1:100 (FACS)             | 45min, ice           |
| CD19                                            | APC/Fire 750 | HIB19      | Biolegend | 302257         | 1:40 (FACS)              | 45min, ice           |
| CD27                                            | PE-Cy7       | LG.3A10    | Biolegend | 124216         | 1:160 (FACS)             | 45min, ice           |
| CD38                                            | PE           | HB-7       | Biolegend | 356604         | 1:160 (FACS)             | 45min, ice           |
| CD38                                            | PerCP/Cy5.5  | HB-7       | Biolegend | 356613         | 1:160 (FACS)             | 45min, ice           |
| CD43 (Core 2 glycoform)                         | -            | 1D4        | LSBio     | LSC179306      | 1:500 (FACS)             | 45min, ice           |
| CD45                                            | APC          | HI30       | Biolegend | 304012         | 1:25 (FACS)              | 45min, ice           |
| CD45 (B220)                                     | Biotin       | RA3-6B2    | BD        | 553086         | 1:100 (FACS)             | 45min, ice           |
| CD45RB (MEM55)                                  | -            | MEM55      | Thermo    | MA1-19115      | 1:500 (FACS)             | 1hr, RT              |
| CD45RB (MEM55)                                  | FITC         | MEM55      | Thermo    | MA1-19571      | 1:5 (FACS)               | 45min, ice           |
| IgD                                             | FITC         | IA6-2      | Biolegend | 348206         | 1:200 (FACS)             | 45min, ice           |
| IgD                                             | PE           | IA6-2      | Biolegend | 348203         | 1:200 (FACS)             | 45min, ice           |
| Streptavidin                                    | FITC         | -          | Biolegend | 405202         | 1:1000 (FACS)            | 30min, ice           |
| Streptavidin                                    | APC          | -          | Biolegend | 405207         | 1:500 (FACS)             | 30min, ice           |
| Zombie NIR Fixable Viability Kit                | -            | -          | Biolegend | 423106         | 1:1600 (FACS)            | 45min, ice           |
| Magnetic sorting antibodies and reagents        |              |            |           |                |                          |                      |
| Target                                          | Conjugate    | Clone      | Source    | Catalog number | Concentration / Dilution | Incubation time      |
| Anti-Biotin microbeads                          | -            | -          | Miltenyi  | 130-090-485    | Manufact. guidelines     | Manufact. guidelines |
| Anti-FITC microbeads                            | -            | -          | Miltenyi  | 130-048-701    | Manufact. guidelines     | Manufact. guidelines |
| IgD                                             | Biotin       | IA6-2      | Biolegend | 348212         | 1:40 (MACS)              | 10min, ice           |
| CD77                                            | FITC         | 5B5        | Biolegend | 357104         | 1:20 (MACS)              | 10min, ice           |
| Western blot and immunoprecipitation reagents   |              |            |           |                |                          |                      |
| Target                                          | Conjugate    | Clone      | Source    | Catalog number | Concentration / Dilution | Incubation time      |
| CD45                                            | -            | HI30       | Biolegend | 304002         | 1µg/mL (WB)              | 1hr, RT              |
| CD45                                            | -            | D9M8l      | CST       | 13917          | 1:2000                   | O/N, 4C              |
| CD45RB (MEM55)                                  | -            | MEM55      | Thermo    | MA1-19115      | 2µg/mL (WB)              | 1hr, RT              |
| <i>Arachis hypogaea</i> (PNA)                   | Biotin       | -          | Sigma     | L6135          | 5µg/mL                   | 1hr, RT              |
| <i>Maackia Amurensis</i> Lectin II (MAL-II)     | Biotin       | -          | Vector    | B-1265         | 0.5µg/mL                 | 1hr, RT              |
| Donkey anti-Goat IgG (H+L)                      | IRDye® 800CW | Polyclonal | Li-Cor    | 926-32214      | 1:20,000 (WB)            | 30min, RT            |

|                            |              |            |        |           |               |           |
|----------------------------|--------------|------------|--------|-----------|---------------|-----------|
| Goat anti-Rabbit IgG (H+L) | IRDye® 800CW | Polyclonal | Li-Cor | 926-32211 | 1:20,000 (WB) | 30min, RT |
| Goat anti-Mouse IgG (H+L)  | IRDye® 800CW | Polyclonal | Li-Cor | 926-32210 | 1:20,000 (WB) | 30min, RT |
| Goat anti-Rabbit IgG (H+L) | IRDye® 680LT | Polyclonal | Li-Cor | 926-68023 | 1:20,000 (WB) | 30min, RT |
| Goat anti-Mouse IgG (H+L)  | IRDye® 680RD | Polyclonal | Li-Cor | 926-68070 | 1:20,000 (WB) | 30min, RT |
| Streptavidin               | IRDye® 800CW | -          | Li-Cor | 926-32230 | 1:10,000 (WB) | 30min, RT |
